# Supplementary material for: Structural Differences in Translation Initiation between Pathogenic Trypanosomatids and Their Mammalian Hosts
Source: PubMed Central journal article supplement — Cell Rep. 2020 Dec 22;33(12):108534. doi: 10.1016/j.celrep.2020.108534 (PMC7773551; doi:10.1016/j.celrep.2020.108534), 2020-12-22
Supplement: mmc1.pdf [file mmc1.pdf]

**Cell Reports, Volume 33**

**Supplemental Information**

**Structural Differences in Translation Initiation  
between Pathogenic Trypanosomatids  
and Their Mammalian Hosts**

**Anthony Bochler, Jailson Brito Querido, Terezie Prilepskaja, Heddy Soufari, Angelita Simonetti, Mayara Lucia Del Cistia, Lauriane Kuhn, Aline Rimoldi Ribeiro, Leoš Shivaya Valášek, and Yaser Hashem**

## **SUPPLEMENTARY FIGURES**

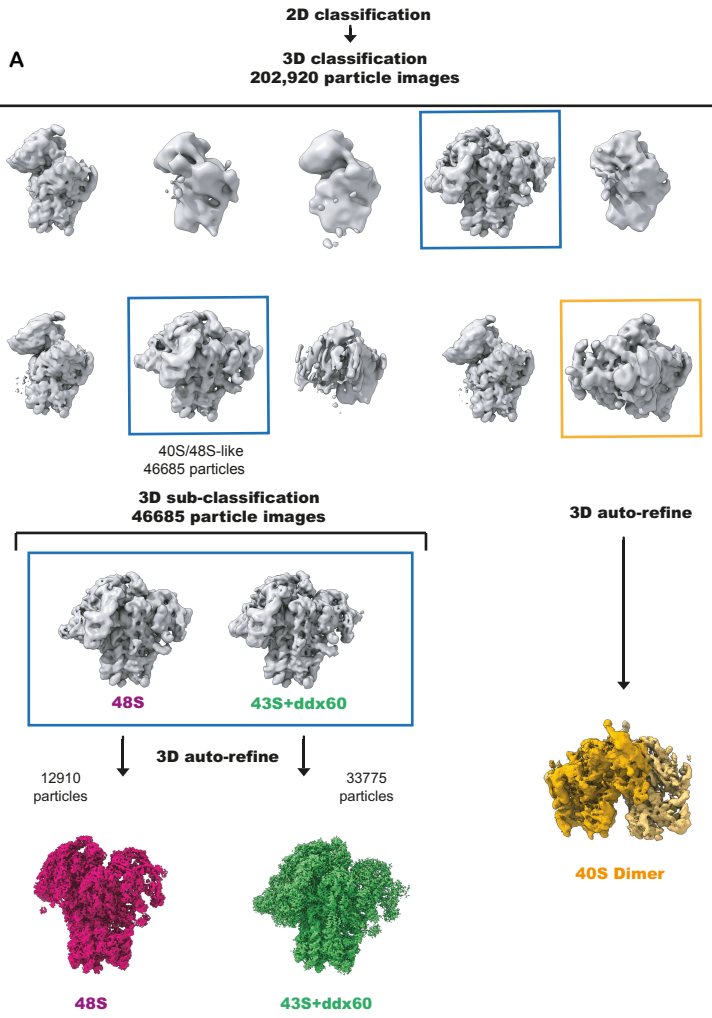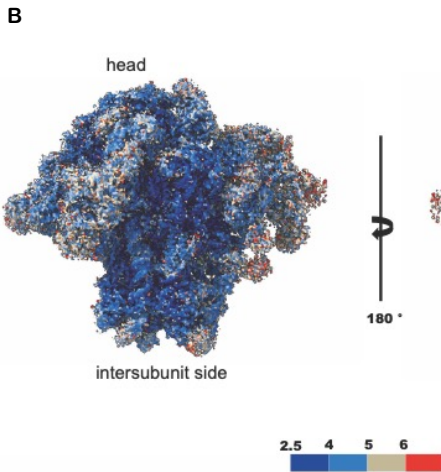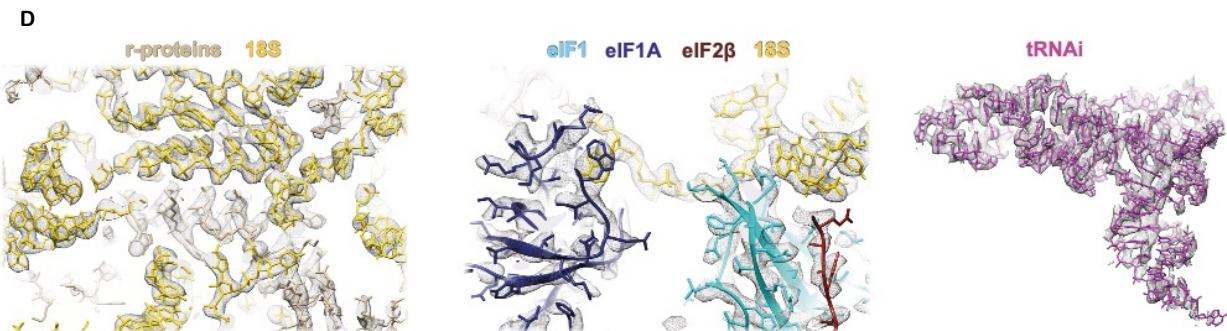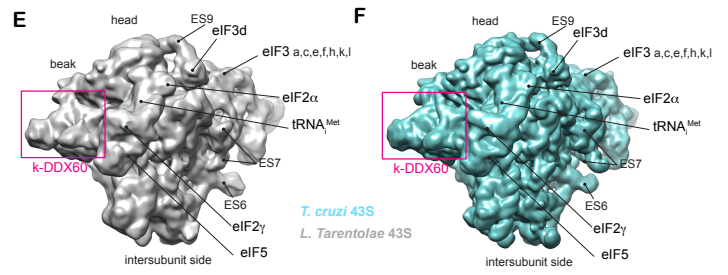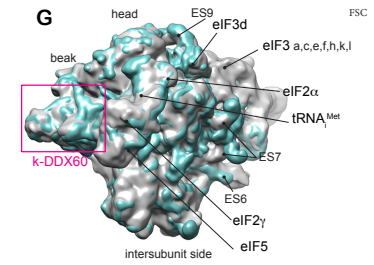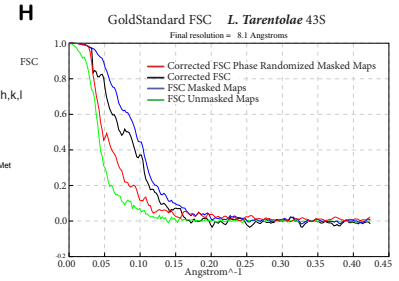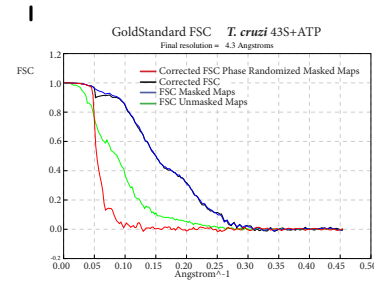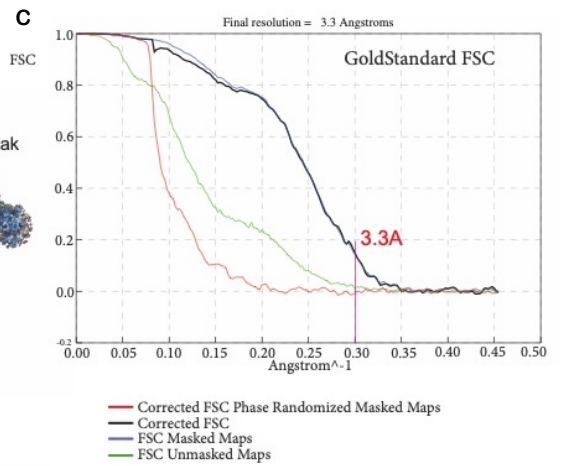

**Supplementary Figure 1. Cryo-EM particle sorting and refinement of the 43S PIC complexes from *T. cruzi* and *L. tarentolae* and their resolutions, Related to Figure 1.** (A) 2D classification of the 43S PIC particles yielded ~200 000 40S-like particles from the *T. cruzi* dataset, after which a run of 3D classification (10 classes) was performed. (B) The local resolution of the 43S class varies mainly on eIF3 (ranging from ~3 to ~6 Å), while it varies less on the rest of the structure (ranging from ~2.5 to ~3.5 Å for the 40S, k-DDX60, eIFs 1, 1A and 2b, and from ~3 to ~5 Å for eIFs 2a, 2g and 5). (C) The average resolution was measured after applying a soft-edge mask of the 43S PIC shape filtered to 15Å and extended by 3 pixels. (D) Blow ups on several features of the complex counting 40S rRNA/r-proteins (left), 18S rRNA interaction with eIF 1 and 1A (middle) and the initiator tRNA<sup>Met</sup> (right), fitted in their corresponding densities. (E) Cryo-EM reconstructions of the *L. tarentolae* 43S PIC. (F) Cryo-EM reconstructions of the *T. cruzi* 43S PIC filtered at 8Å. (G) Superimposition of (E) and (F). (H) Average resolution (8.1Å) of the *L. tarentolae* 43S PIC reconstruction. (I) Average resolution (4.3Å) of the cryo-EM reconstruction from the *T. cruzi* 43S complexes supplemented with ATP.

**A**

|                                 |                                                                                                         |     |
|---------------------------------|---------------------------------------------------------------------------------------------------------|-----|
| <i>Leishmania donovani</i> (K)  | -----MRDINRQGVV                                                                                         | 12  |
| <i>Leishmania major</i> (K)     | MASYCVTDSPETVDYKTKCCCRITDNYVYVKEFEYRNLGSLARRKLLAEFFVPEVDCRTLDHLLVLEKATILSAQV---EGETKGSNNRPEFWMRDINRQGVV | 106 |
| <i>Trypanosoma brucei</i> (K)   | MAAYGIVESPENVDYKTKCCCRITDNYVYVKEFEYRNLGSLARRKLLAEFFVPEVDCRTLDHLLVLEKATILSAQV---EGETKGSNNRPEFWMRDINRQGVV | 109 |
| <i>Trypanosoma cruzi</i> (K)    | MASHGIVKIEVDYKTKCCCRITDNYVYVKEFEYRNLGSLARRKLLAEFFVPEVDCRTLDHLLVLEKATILSAQV---EGETKGSNNRPEFWMRDINRQGVV   | 110 |
| <i>Strigomonas culicis</i> (K)  | MTSYRIIDNPEVDYKTKCCCRITDNYVYVKEFEYRNLGSLARRKLLAEFFVPEVDCRTLDHLLVLEKATILSAQV---EGETKGSNNRPEFWMRDINRQGVV  | 104 |
| <i>Drosophila hydei</i>         | -----MALT-SR                                                                                            | 6   |
| <i>Homo sapiens</i>             | -----MFLIS-CR                                                                                           | 7   |
| <i>Mus musculus</i>             | -----MFLIS-CR                                                                                           | 7   |
| <i>Oryctolagus cuniculus</i>    | -----MFLIS-CR                                                                                           | 7   |
| <i>Saccharomyces cerevisiae</i> | -----MSTSH-CR                                                                                           | 7   |
| <i>Plasmodium berghei</i>       | -----MGDARSKTLDGDCR                                                                                     | 14  |
| <i>Plasmodium falciparum</i>    | -----MTEMRVKADLGDCR                                                                                     | 14  |

  

|                                 |                                                                                                               |     |
|---------------------------------|---------------------------------------------------------------------------------------------------------------|-----|
| <i>Leishmania donovani</i> (K)  | CGCLGITSDWGRD-IFVETMPKINDVWVKITQVNDTSAVVGLLEYGHRGELIPIYETVTRRRVSRMGRLIKVGRTEPAQVIRIDPKRGVLDLSSKRLVTEFNKAKAEAH | 121 |
| <i>Leishmania major</i> (K)     | CGCLGITSDWGRD-IFVETMPKINDVWVKITQVNDTSAVVGLLEYGHRGELIPIYETVTRRRVSRMGRLIKVGRTEPAQVIRIDPKRGVLDLSSKRLVTEFNKAKAEAH | 215 |
| <i>Trypanosoma brucei</i> (K)   | CGCLGITSDWGRD-IFVETMPKINDVWVKITQVNDTSAVVGLLEYGHRGELIPIYETVTRRRVSRMGRLIKVGRTEPAQVIRIDPKRGVLDLSSKRLVTEFNKAKAEAH | 218 |
| <i>Trypanosoma cruzi</i> (K)    | CGCLGITSDWGRD-IFVETMPKINDVWVKITQVNDTSAVVGLLEYGHRGELIPIYETVTRRRVSRMGRLIKVGRTEPAQVIRIDPKRGVLDLSSKRLVTEFNKAKAEAH | 219 |
| <i>Strigomonas culicis</i> (K)  | CGCLGITSDWGRD-IFVETMPKINDVWVKITQVNDTSAVVGLLEYGHRGELIPIYETVTRRRVSRMGRLIKVGRTEPAQVIRIDPKRGVLDLSSKRLVTEFNKAKAEAH | 214 |
| <i>Drosophila hydei</i>         | -----FYNERYPEDIVMNVNLSIAEMGAVVHLLYNNIEGMILLSELSSRRIRSNKILIRVGRTEFVWVIRVDRKGVLDLSSKRLVTEFNKAKAEAH              | 100 |
| <i>Homo sapiens</i>             | -----FYCHRFFPEVDVWVNVRSIAEMGAVVSLIYNNIEGMILLSELSSRRIRSNKILIRVGRTEFVWVIRVDRKGVLDLSSKRLVTEFNKAKAEAH             | 101 |
| <i>Mus musculus</i>             | -----FYCHRFFPEVDVWVNVRSIAEMGAVVSLIYNNIEGMILLSELSSRRIRSNKILIRVGRTEFVWVIRVDRKGVLDLSSKRLVTEFNKAKAEAH             | 101 |
| <i>Oryctolagus cuniculus</i>    | -----FYCHRFFPEVDVWVNVRSIAEMGAVVSLIYNNIEGMILLSELSSRRIRSNKILIRVGRTEFVWVIRVDRKGVLDLSSKRLVTEFNKAKAEAH             | 101 |
| <i>Saccharomyces cerevisiae</i> | -----FYENRYPEIDIVMNVNLSIAEMGAVVHLLYNNIEGMILLSELSSRRIRSNKILIRVGRTEFVWVIRVDRKGVLDLSSKRLVTEFNKAKAEAH             | 101 |
| <i>Plasmodium berghei</i>       | -----FYEKFFPEVDLIMVKNRIEDMGAVVSLIYNNIEGMILLSELSSRRIRSNKILIRVGRTEFVWVIRVDRKGVLDLSSKRLVTEFNKAKAEAH              | 108 |
| <i>Plasmodium falciparum</i>    | -----FYRKKFFPEVDLIMVKNRIEDMGAVVSLIYNNIEGMILLSELSSRRIRSNKILIRVGRTEFVWVIRVDRKGVLDLSSKRLVTEFNKAKAEAH             | 108 |

**B**

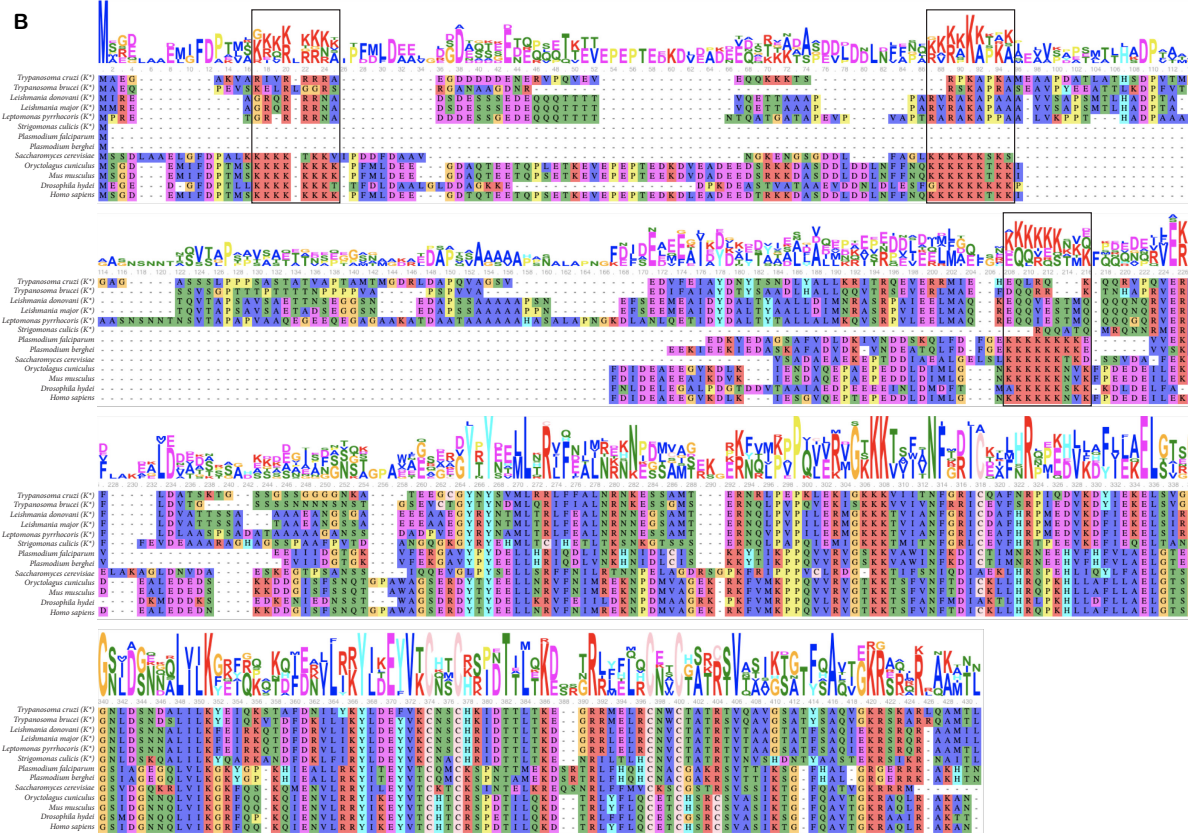

Ser264 in yeast

**C**

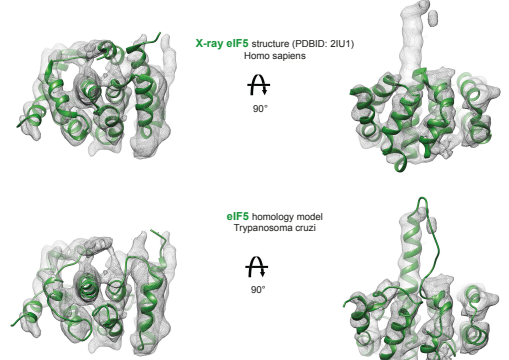

**Supplementary Figure 2. Multiple sequence alignment of the eIF2 $\alpha$  NTD and eIF2 $\beta$  among eukaryotes, and eIF5 CTD structure, Related to Figure 2.** (A) Protein sequence alignment of eIF2 $\alpha$  from various eukaryotic organisms was generated by ClustalW (MultiWay, scoring matrix: Blosum 62). The Kinetoplastida order species are labeled with K\*. The kinetoplastid-specific eIF2 $\alpha$  N-terminal domain insertion is marked with a black box. Areas of high matches (60%) are shaded in green. The individual species with the NCBI Reference Sequence numbers or TriTrypDB numbers are as follows: [*Trypanosoma cruzi*] PWV18423.1, [*Trypanosoma brucei*] Tb927.3.2900, [*Leishmania donovani*] AAQ02666.1, [*Leishmania major*] LmjF.03.0980, [*Strigomonas culicis*] EPY26930.1, [*Plasmodium falciparum* NF54] PKC42156.1, [*Plasmodium berghei* ANKA] VUC53995.1, [*Saccharomyces cerevisiae*] ONH75775.1, [*Oryctolagus cuniculus*] XP\_002719561.1, [*Mus musculus*] NP\_080390.1, [*Drosophila hydei*] XP\_023166950.2, [*Homo sapiens*] NP\_004085.1. (B) Protein sequence alignment of eIF2 $\beta$  protein from various eukaryotic organisms. The Kinetoplastida order species are labeled with K\*. Consensus is expressed as a sequence logo. The black boxes mark three conserved poly-lysine stretches (dubbed K-boxes) K1, K2 and K3. (C) Rigid-body fittings of the crystal structure of the human eIF5 CTD in the corresponding *T. cruzi* 43S PIC density (up) and its *T. cruzi* eIF5 CTD homology model in that same density (bottom).

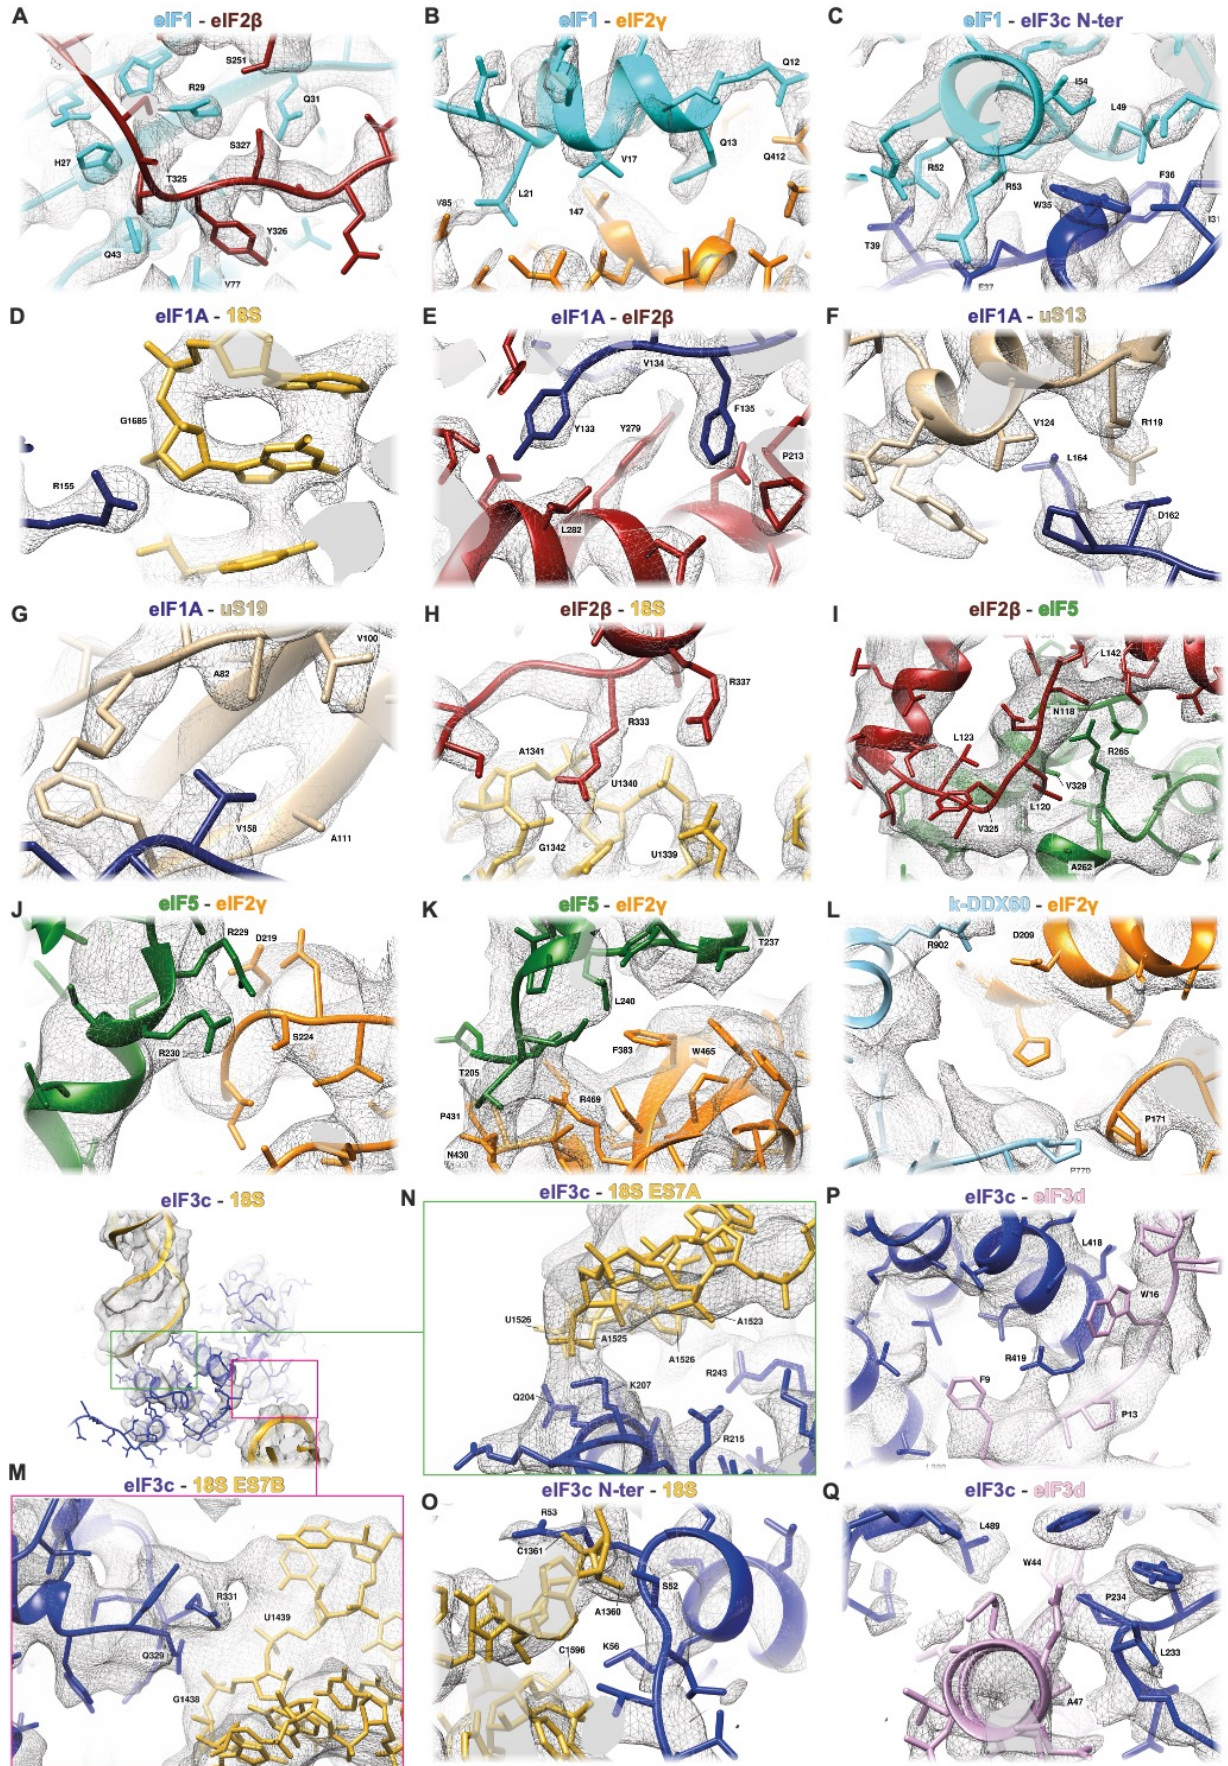

**Supplementary Figure 3. Novel interactions between several eIFs, r-proteins and 18S rRNA, fitted in their corresponding densities, Related to Figures 2 and 3. (A) eIF1 with eIF2 $\beta$ . (B) eIF1 N-ter tail with eIF2 $\gamma$ . (C) eIF1 with eIF3c N-ter. (D) eIF1A with the 18S. (E) eIF1A with eIF2 $\beta$ . (F) eIF1A with uS13. (G) eIF1A with uS19. (H) eIF2 $\beta$  with the 18S. (I) eIF2 $\beta$  with eIF5 CTD. (J and K) eIF5 CTD with eIF2 $\gamma$ . (L) eIF2 $\gamma$  with k-DDX60. (M, N and O) 18S with eIF3c. (P and Q) eIF3c and eIF3d subunits.**



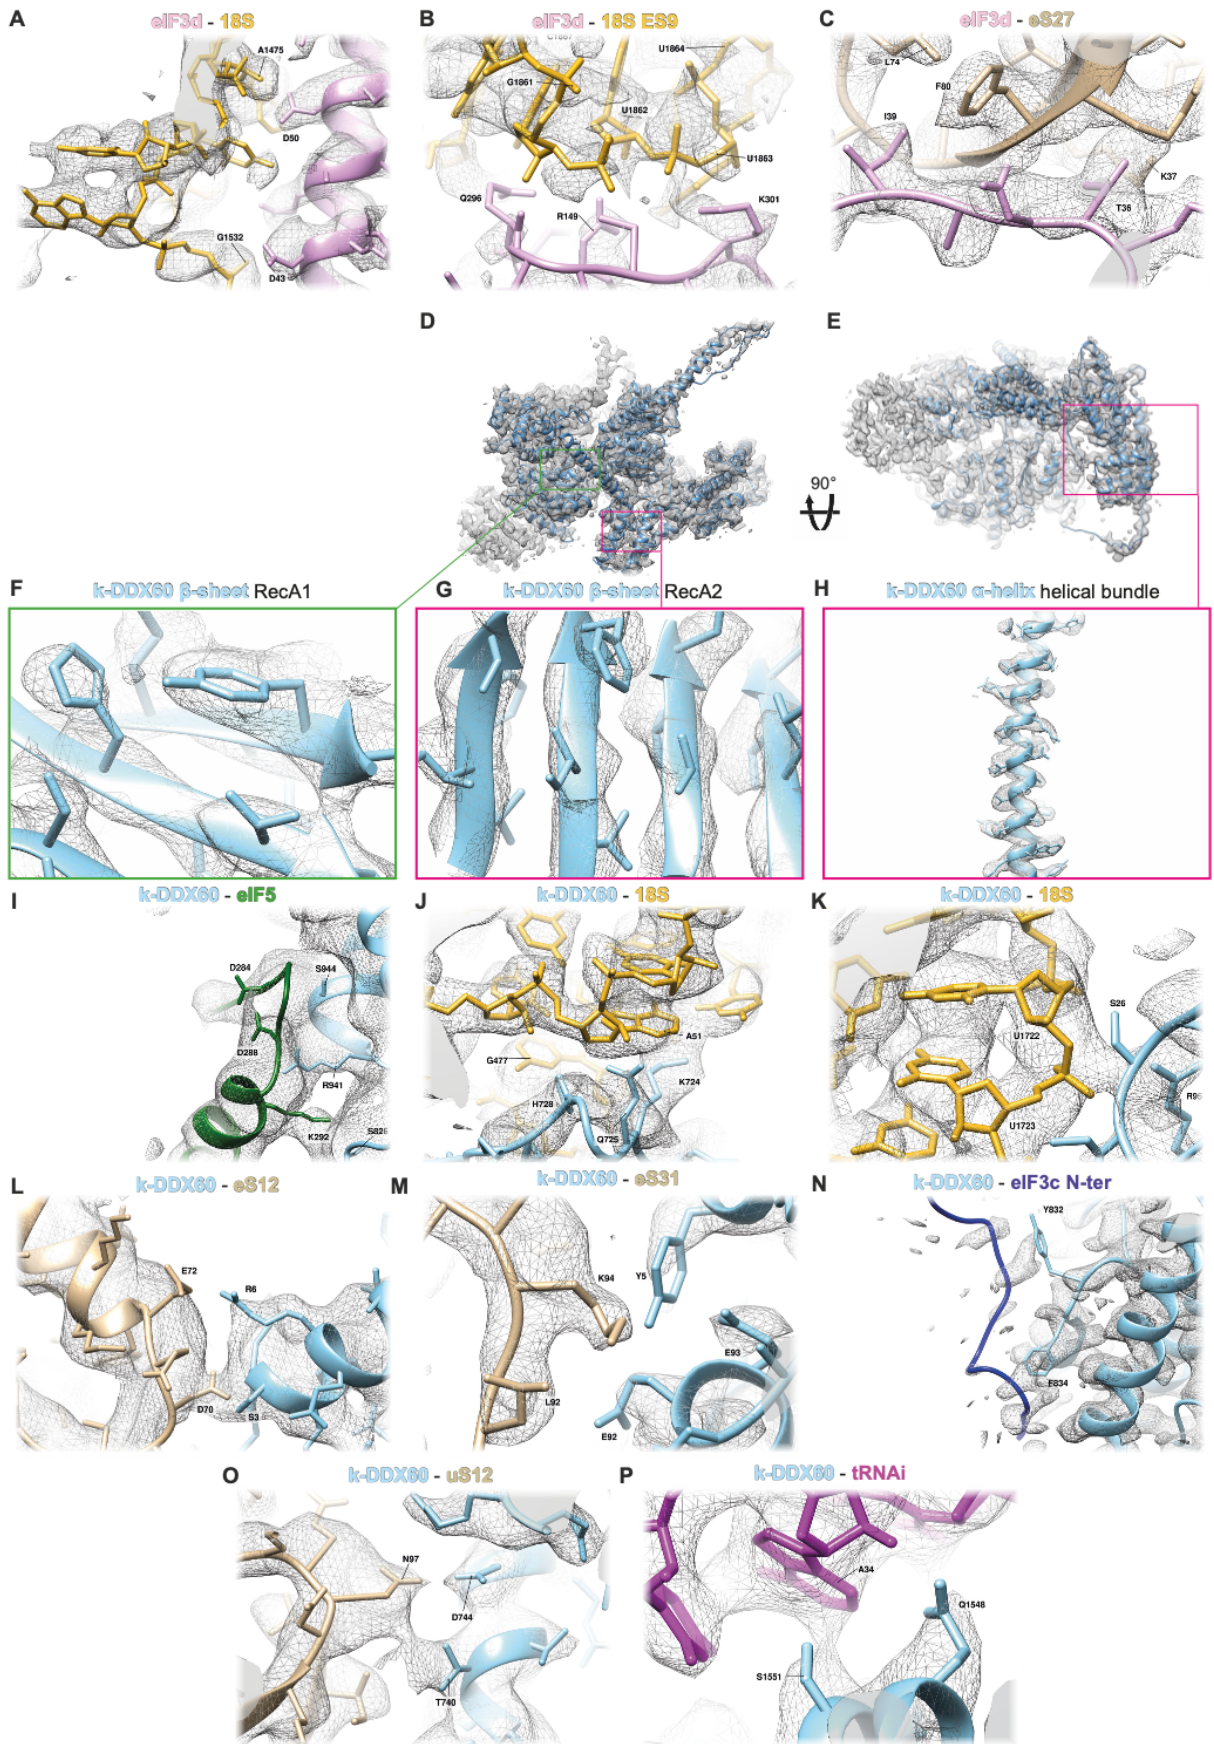

**Supplementary Figure 4. Interactions of eIF3d and k-DDX60 with eIFs, r-proteins and 18S rRNA, fitted in their corresponding densities, Related to Figures 2 and 3. (A and B) eIF3d with the 18S. (C) eIF3d with eS27. (D and E) k-DDX60 in its corresponding density, viewed from two orientations. (F, G and H) Blow ups on two  $\beta$ -sheets from helicase RecA domains and one buried  $\alpha$ -helix from a helical bundle from K-DDX60. Interactions of k-DDX60 with eIF5 (I), 18S (J and K), eS12 (L), eS31 (M), eIF3c N-ter (N), uS12 (O) and the initiator tRNA<sup>Met</sup> (P).**

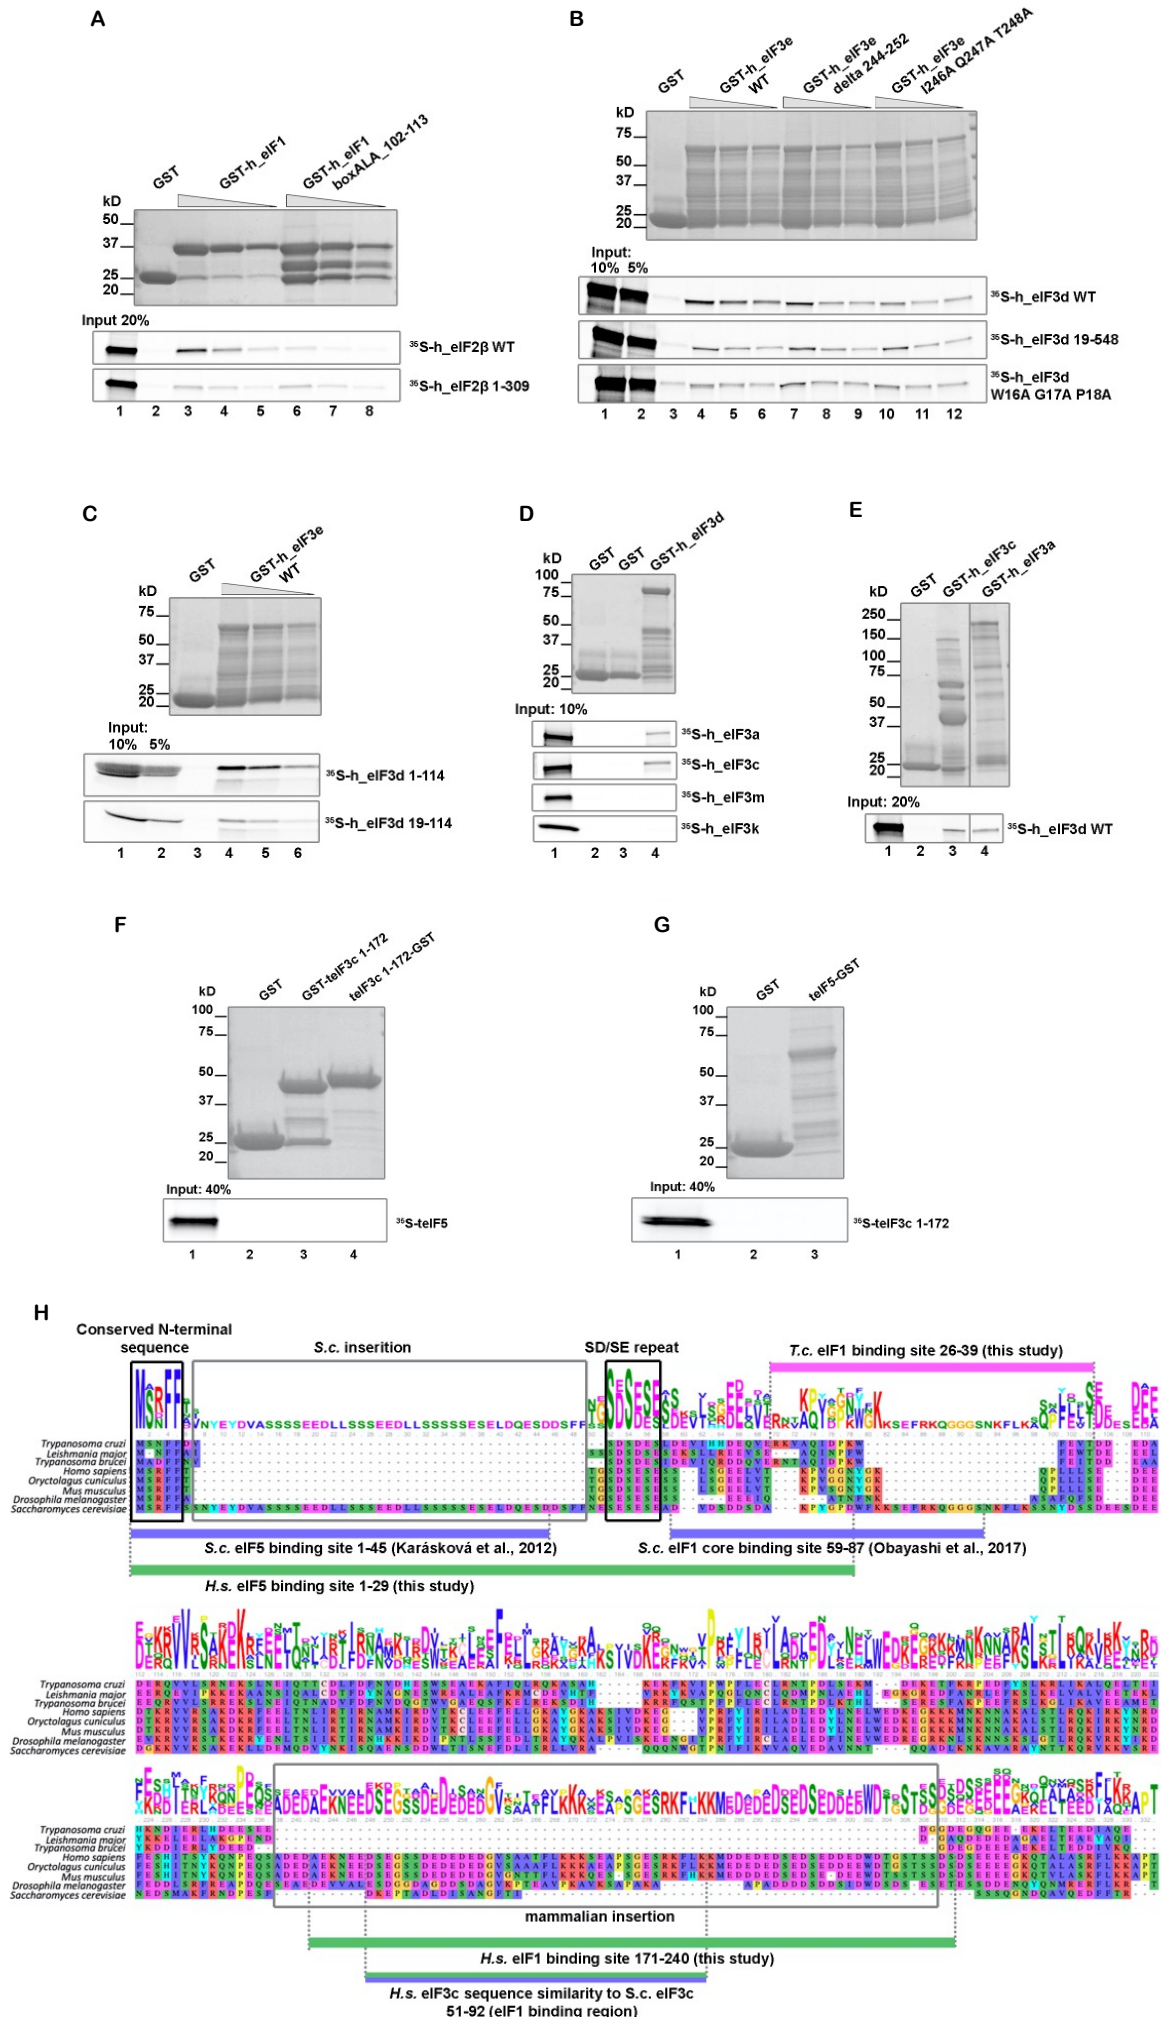

**Supplementary Figure 5. *In vitro* analysis of eIF3 intersubunit interactions , Related to Figures 2 and 3.** (A) *In vitro* protein-protein binding analysis of the interaction between the *in vitro* translated human <sup>35</sup>S-labeled eIF2 $\beta$  and its C-terminal truncation (eIF2 $\beta$  1-309) against wild type eIF1 or its mutated variant (eIF1-boxAla-102-113; residues 102-113 substituted with a stretch of alanines) fused to GST. *In vitro* translated proteins were tested for binding with three different dilutions of individual GST-fusion proteins. Lane 1 contains 20% of input amounts of *in vitro*-translated proteins added to each reaction. (B) Same as in (A) except that binding between the human wild type eIF3d subunit, its N-terminally truncated form (19-548), and its mutated variant (W16A G17A P18A) against the human wild type eIF3e subunit, or its inner deletion (delta 244-252), or its mutated variant (I246A Q247A T248A) fused to GST was analyzed. Lanes 1 and 2 show 10% and 5% input, respectively. Quantification was performed by the Quantity One software (see Fig. 3J.) (C) Same as in (A) except that binding between truncations of the human eIF3d subunit (1-114 and 19-114) and eIF3e fused to GST was analyzed. Quantification is presented in Fig. 3K. (D) *In vitro* protein-protein binding analysis of <sup>35</sup>S-labeled eIF3a, eIF3c, eIF3k and eIF3m subunits against eIF3d fused to GST. Lane 1 shows 10% input. (E) *In vitro* protein-protein binding analysis of human <sup>35</sup>S-labeled eIF3d against eIF3c and eIF3a subunits fused to GST. Lane 1 shows 20% input. (F) *In vitro* protein-protein binding analysis of the interaction between *T. cruzi* eIF5 and the eIF3c-NTD (residues 1-172) fused with GST either at its N or C terminus. (G) Binding analysis of the interaction between *T. cruzi* the eIF3c-NTD (residues 1-172) and eIF5-GST. (H) Multiple protein alignment of the N-terminal domain of the eIF3c subunit from indicated species with a consensus expressed as a sequence logo. Specific sequence features mentioned in the main text are boxed. Positions of eIF1- and eIF5-binding sites in the eIF3c-NTD of the selected species identified by us and others are marked by thick lines under or above the alignment; color-coding is as follows: *T.c.* – *Trypanosoma cruzi* in pink, *S.c.* – *Saccharomyces cerevisiae* in purple, and *H.s.* – *Homo sapiens* in green.

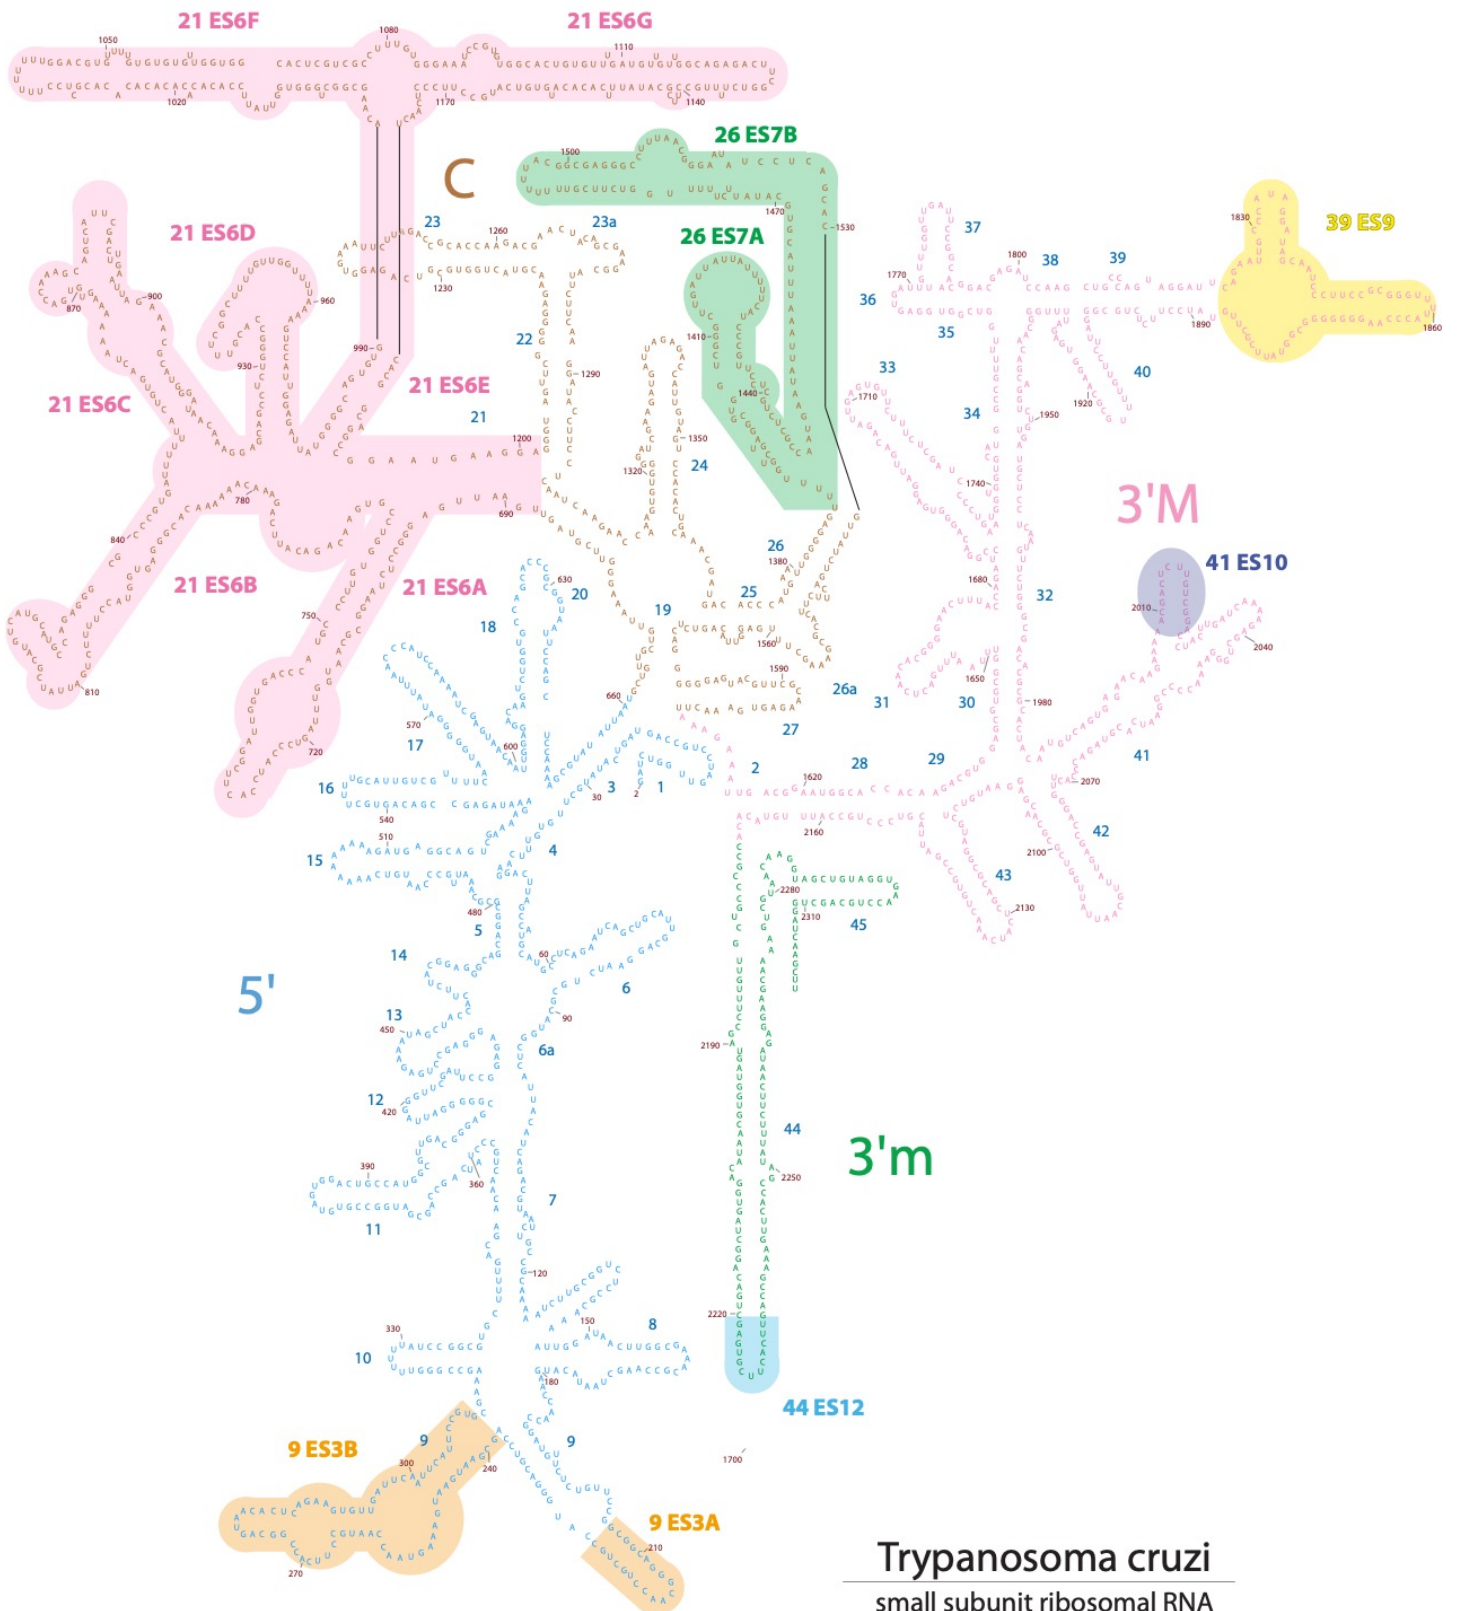

**Supplementary Figure 6.** *T. cruzi* 18S rRNA, Related to Figures 4 and 5. 2D diagram of the *T. cruzi* 18S rRNA. The largest and more relevant expansion segments are highlighted in colored backgrounds.

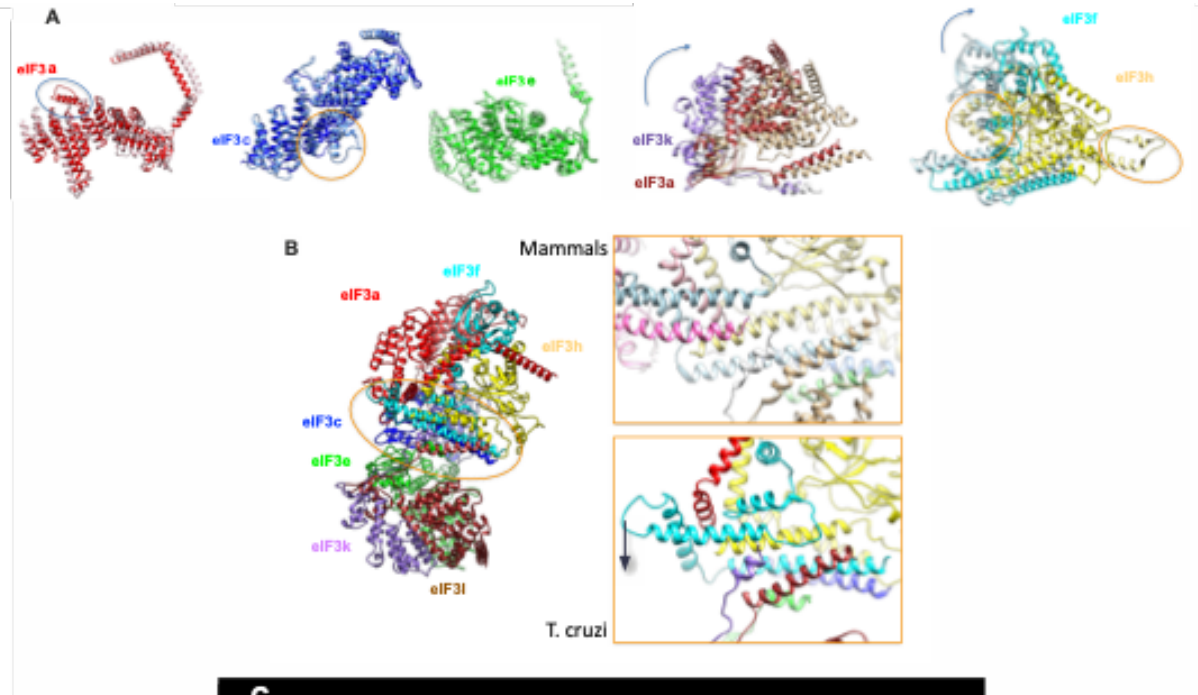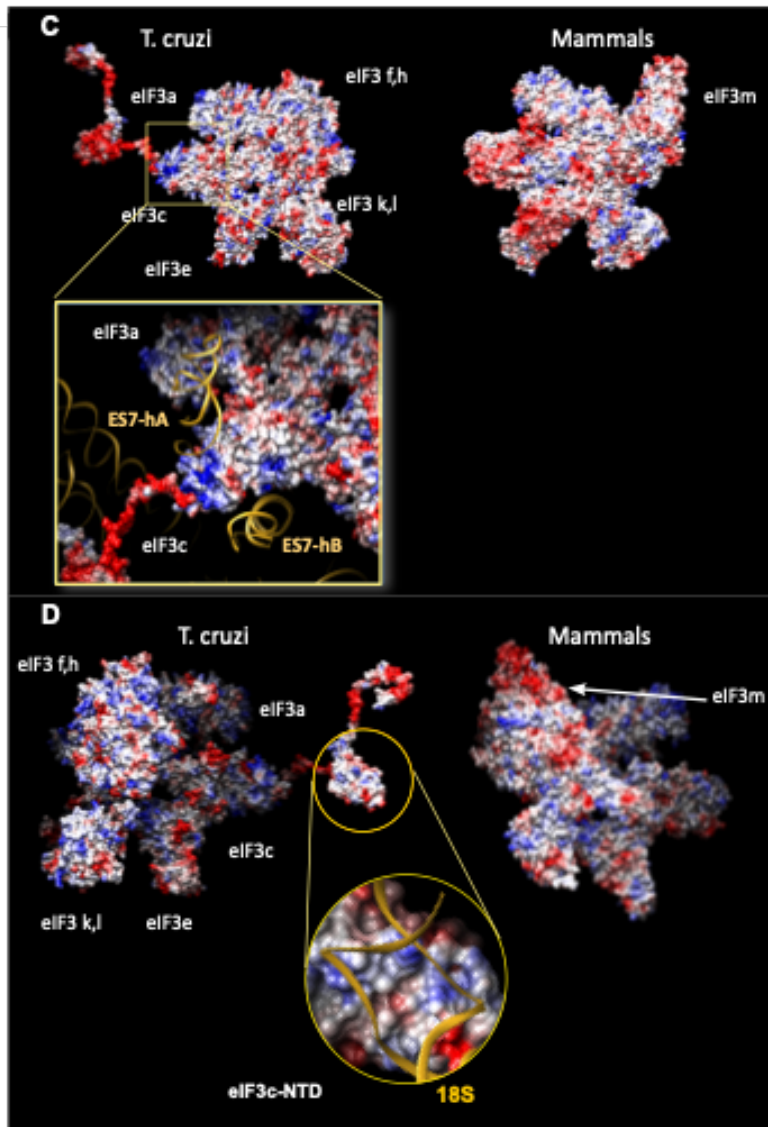

**Supplementary Figure 7. Charge surface analysis of the *T. cruzi* and mammalian eIF3 structures, Related to Figures 3.** (A) Overlay of mammalian and kinetoplastid structures of individual eIF3 subunits with marked structural differences. The *T. cruzi* structures are depicted in dark and mammalian in light color shades. Curved arrows indicate the direction of *T. cruzi* eIF3 subunits structural rearrangement compared to their mammalian counterparts. Colored ovals highlight marked structural differences between *T. cruzi* and mammalian eIF3 subunits. (B) Cartoon representation of the eIF3 atomic model showing the eIF3 helical bundle in mammals (upper panel) and in *T. cruzi* (lower panel). Dark arrow indicates the shift of a helix from eIF3f in *T. cruzi* to compensate for the absence of eIF3m. (C) Surface representation of the *T. cruzi* (left) and mammalian (right) eIF3 structure seen from the 40S platform side. Lower panel: close-up view of *T. cruzi* eIF3c and its interaction with the ES7<sup>s</sup> helix A and helix B. Model is color-coded according to the electrostatic potential – negative in red and positive in blue. (D) Surface representation of the *T. cruzi* (left) and mammalian (right) eIF3 structure seen from the 40S solvent side. Lower panel: close-up view of the *T. cruzi* eIF3c-NTD and its interaction with 18S RNA.

**A**

Alignment Scores ■ < 40 ■ 40 - 50 ■ 50 - 80 ■ 80 - 200 ■ ≥ 200

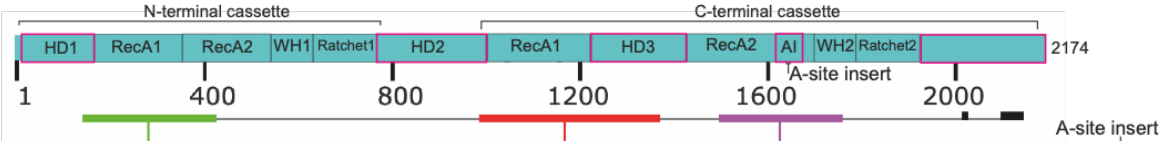

| Score                   | Expect                                                      | Method                       | Identities                                       | Positives    | Gaps       |
|-------------------------|-------------------------------------------------------------|------------------------------|--------------------------------------------------|--------------|------------|
| 54.3 bits(129)          | 1e-10                                                       | Compositional matrix adjust. | 74/294(25%)                                      | 121/294(41%) | 28/294(9%) |
| <b>t.c. k-DDX60</b> 146 | SEMFFIDGDSLFMAALSPQSDVMDLIQPLHVIYNAQKLLYDMBCRGARFHVFFDSLLWI | 205                          | S F IDGDSL + L +S W Q LH Y + L D+ G +F +VFF +    |              |            |
| <b>h.s. DDX60</b> 36    | SNFFVDDGSLVTCCLVKSFKWG--QNLHFFYLVECTLVLLSNGGQPTIVFFKDAEYA   | 93                           |                                                  |              |            |
| <b>t.c. k-DDX60</b> 206 | WESAPAKLFMRENLKMLSENDAKVLGISNFSYSSEAFETYVQWEEPEFLMSDDG      | 265                          | + F L +R L L L + D + + FS S+ + + + Q F F + + S + |              |            |
| <b>h.s. DDX60</b> 94    | YFFPELLLRKALLLHQLNHNFDVQ----TFEFGCLSDQMKLQDHPFFVTEV--       | 147                          |                                                  |              |            |
| <b>t.c. k-DDX60</b> 266 | EOLGRNF-LOAFFVRPSAANNTHDSRRKANYTDADEANFYRLRROYRSIV--EDEAVG  | 321                          | B L L L F + S + + +D Y + + R+ E+B V              |              |            |
| <b>h.s. DDX60</b> 148   | BGLSDLYLNFLLIHSWGMKVVNVLSSGHSRDLTRFYAYTMESTDRNQTFSKENETVI   | 207                          |                                                  |              |            |
| <b>t.c. k-DDX60</b> 322 | DKAALYTCILNAAATRLKVAYSRRIYKENM----VFFTVR--VGGASFERAVTI      | 373                          | A Y I H R L + A + + M + F + + 4G+ 4R + +         |              |            |
| <b>h.s. DDX60</b> 208   | QSA--YKSLTQHLBEIRVLYLATHEFLKNDMMEEAYQTFLQLHNSGSDIQRVLCV     | 265                          |                                                  |              |            |
| <b>t.c. k-DDX60</b> 374 | ESVQALQSMHEVQLPAISSASGLLEDDLSRCRERVVAALHAYRASARS            | 427                          | S +L+ M H V + S L L + ED CR R + + + +L S R +     |              |            |
| <b>h.s. DDX60</b> 266   | TS--CELSRHYHRV---LVHSNCLSLQVEVDF-CRLRLCVAFQHLPLSQRA         | 313                          |                                                  |              |            |

| Score                    | Expect                                                      | Method                       | Identities                                          | Positives    | Gaps        |
|--------------------------|-------------------------------------------------------------|------------------------------|-----------------------------------------------------|--------------|-------------|
| 116 bits(290)            | 2e-29                                                       | Compositional matrix adjust. | 90/278(32%)                                         | 128/278(46%) | 31/278(11%) |
| <b>t.c. k-DDX60</b> 1482 | VIRELIARDMGPPTIVFSPBSEDGDLVKYVVVQLEAEBSRYKRTNEPALYKARIERAAA | 1541                         | ++ +L D E I F P + + + D G V LE+ E+ + E Y A          |              |             |
| <b>h.s. DDX60</b> 1097   | LVBKLRQMDKLPALFFLKNDDVGRAGSVCFTLEKTEKSPHTECHSY----VFAI      | 1150                         |                                                     |              |             |
| <b>t.c. k-DDX60</b> 1542 | QIARRKQRESLKQKRLTCDGDVEVADRMSDGEDELFFVVDVLPPEFTFIEGKCTV     | 1601                         | B K R+ + QRR+ T + E + R + +L I E CT                 |              |             |
| <b>h.s. DDX60</b> 1151   | DEVLEKVRKT---QKRTTKMFKRAKLEKKVYRAEYINFLNKLILB----I SEDCTY   | 1203                         |                                                     |              |             |
| <b>t.c. k-DDX60</b> 1602 | BPEVVDGLMEDCEKEGEDLLRAL-----QRGIGMHRAGVKGKLRRAHVE           | 1645                         | V +L + + + L R L QRGIG HR+ + K + VE                 |              |             |
| <b>h.s. DDX60</b> 1204   | AD--VVALHTEITENKDSFLRVRFRFRHGRKELKALAQKIGYHSSSMYFKEKFEVE    | 1261                         |                                                     |              |             |
| <b>t.c. k-DDX60</b> 1646 | RLFGRGCGVIFSTETLALGHSPCRSVLAGDHLINLPQFQMMGRAGRGLDVLGH       | 1705                         | LF V+ +ZETLALGHI PC+SVV A D + L+ +RQ GRAGRRG D LG++ |              |             |
| <b>h.s. DDX60</b> 1262   | ILFVKGRLRVVTTATETLALGILMPCVSVFQDSVYLDALNVRQMSGRAGRQDGLGNV   | 1321                         |                                                     |              |             |
| <b>t.c. k-DDX60</b> 1706 | VFLGTMRRIRKRLTSMVTKGVQMDPTNLRLLQL                           | 1743                         | F I + +IKRL+ SS+ + G + LRL+ L                       |              |             |
| <b>h.s. DDX60</b> 1322   | YFFDPLPKIKRLASSVFLGRQVFLSLTLVLRMLL                          | 1359                         |                                                     |              |             |

| Score                    | Expect                                                      | Method                       | Identities                                             | Positives    | Gaps        |
|--------------------------|-------------------------------------------------------------|------------------------------|--------------------------------------------------------|--------------|-------------|
| 220 bits(561)            | 3e-61                                                       | Compositional matrix adjust. | 143/409(35%)                                           | 206/409(50%) | 60/409(14%) |
| <b>t.c. k-DDX60</b> 980  | GTLPLSLLPQDKQ----LFETPEMLQLIEMGHLLRPFVREHDYRVA-FNPDNWRQELL  | 1033                         | +L P+L+ DK + P QC +MCH L R ++ D RV F P+ WQ+ELL         |              |             |
| <b>h.s. DDX60</b> 693    | NSLDPLTIGDGNKKKYSIDIGFANPQLQYMGHYLIRDERKORDPRVQDFIPNAWQQLL  | 752                          |                                                        |              |             |
| <b>t.c. k-DDX60</b> 1034 | DIVDGRGSAVVCAPTSAKTEISYCYMKAALRNTKRVVYVLAAPARALINGAVADVCARY | 1093                         | D+VD SAV+ APTS+GRK+ STYCK K LR ++ VVVY+APA+L+ Q A V R+ |              |             |
| <b>h.s. DDX60</b> 753    | DVDEKESAVIAPFSSGKRTAIVYCMKERVLESQVVVVYVAEAKLQGVVAATVENRF    | 812                          |                                                        |              |             |
| <b>t.c. k-DDX60</b> 1094 | GSKKYKPCRVIYGAIGGADYHGFHSDSQVLLVFPETPMLLSKPYTQWELIDYVILD    | 1153                         | E GR + GA DY +CQL+VVE FE +LL+P WYE I VVI D             |              |             |
| <b>h.s. DDX60</b> 813    | T--KLPAGRTLCGAF--TRDYRNVLMCOVLLVPECFEILLALPHRQKWKVERIVYFD   | 869                          |                                                        |              |             |
| <b>t.c. k-DDX60</b> 1154 | EHSMSNGNGDVMRIRALLPCFPVALSATLGETQQLCSWLNHVQGRKKEQTEEK----   | 1209                         | E+H + NE +L+ + + CPF+ LSAT+ L WL V+ + K+ + M           |              |             |
| <b>h.s. DDX60</b> 870    | BVHYLGRVGAQFWELLVIIRCPFLVLSATINNPILLTKWLSQVYKQADKIMEEK      | 929                          |                                                        |              |             |
| <b>t.c. k-DDX60</b> 1210 | -----SGKMRDFEVLHLPSEKRSIQHNDIKKIYVLPFGAALQKKIK              | 1253                         | S K + +EV L+ +R+ND+K+I                                 |              |             |
| <b>h.s. DDX60</b> 930    | ISEKQADKCLNPLQDHSYKNSYEVRLVLCG-----ERYNDLEKHI-----CS        | 972                          |                                                        |              |             |
| <b>t.c. k-DDX60</b> 1254 | AQYNKYIRDHLPLSILEADQLR--GPPDILVSPSEVVSLEKMSKFNVEVWVWVSYSL   | 1312                         | +++ Y HP + LT D +++ GPPD+L P E + L+ M + WP             |              |             |
| <b>h.s. DDX60</b> 973    | VKHDVYFDHFHPCAALTDIIEKYGFPPDLTLTQBSIQLDHMAQVWE--TWP-----    | 1025                         |                                                        |              |             |
| <b>t.c. k-DDX60</b> 1313 | QLAKTRAQMLLEPSKYFEATYITQERRARQYAEVKNFAFYWYLGH               | 1361                         | RAQ + E F+ + I + AR+YE +R W G                          |              |             |
| <b>h.s. DDX60</b> 1026   | -----RAQELCPREIFLFWKIVIKKLDARVEENLKRLTWKNGQ                 | 1068                         |                                                        |              |             |

**B**

ATP binding pocket

Unmodeled 1867-2174

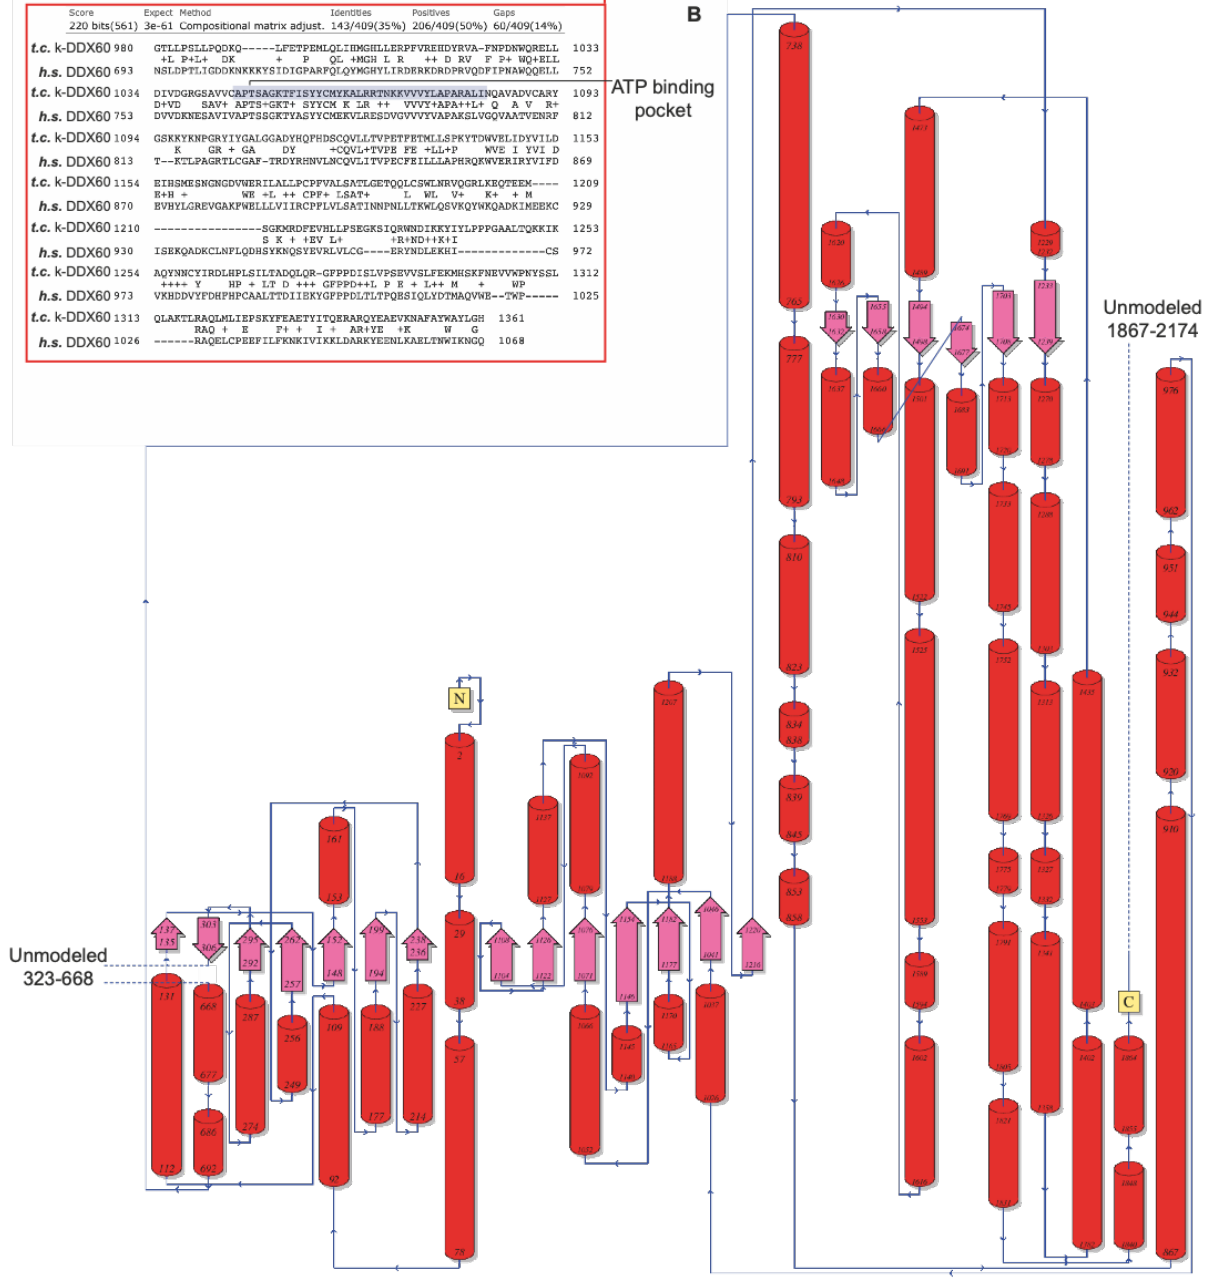



**Supplementary Figure 8. *T. cruzi* 18S k-DDX60 conservation and secondary structure diagram, Related to Figures 4 and 5.** (A) BlastP alignment between *T. cruzi* k-DDX60 and human DDX60 showing the relatively modest global homology between both proteins. Only most homologous regions were presented (in green, purple and red boxes). Magenta boxes on domains annotation schema highlight the trypanosomatid-specific domains that are inexistent in DDX60 from human and other eukaryotic species. Pink and violet colors highlight the A-site Insert (AI) and the ATP binding pocket in k-DDX60, respectively. (B) Secondary structure elements diagram for k-DDX60 based on its 3D model. Some parts could not be modeled.

## SUPPLEMENTARY TABLES

|                                |                   |                                                                                                          |     | BASIC Spectral Count (# spectra) |                      |  |
|--------------------------------|-------------------|----------------------------------------------------------------------------------------------------------|-----|----------------------------------|----------------------|--|
|                                |                   |                                                                                                          |     | BEFORE Gel Filtration            | AFTER Gel Filtration |  |
| Q4E5Z1 Q4E5Z1_TRYCC            | <b>DDX60</b>      | Uncharacterized protein OS=Trypanosoma cruzi (strain CL Brener) GN=TC00.1047053508153.1050               | 10  | 263                              | 96                   |  |
| Q4DLI2 Q4DLI2_TRYCC            | <b>ABCE1</b>      | Ribonuclease L inhibitor, putative OS=Trypanosoma cruzi (strain CL Brener) GN=TC00.10470535086           | 3   | 103                              | 31                   |  |
| <b>40S ribosomal proteins:</b> |                   |                                                                                                          |     |                                  |                      |  |
|                                |                   |                                                                                                          |     | BASIC Spectral Count (# spectra) |                      |  |
|                                |                   |                                                                                                          |     | BEFORE Gel Filtration            | AFTER Gel Filtration |  |
| accession                      |                   | description                                                                                              | 40S | 43S                              | 43S                  |  |
| Q4D5P4 Q4D5P4_TRYCC            |                   | 40S ribosomal protein S4 OS=Trypanosoma cruzi (strain CL Brener) GN=TC00.1047053509683.117               | 131 | 131                              | 93                   |  |
| Q4DTN2 Q4DTN2_TRYCC            |                   | Activated protein kinase C receptor, putative OS=Trypanosoma cruzi (strain CL Brener) GN=TC00.10         | 100 | 96                               | 48                   |  |
| Q4E0Q3 Q4E0Q3_TRYCC            |                   | 40S ribosomal protein S5, putative OS=Trypanosoma cruzi (strain CL Brener) GN=TC00.1047053506            | 65  | 51                               | 40                   |  |
| Q4DZ41 RS3A2_TRYCC             |                   | 40S ribosomal protein S3a-2 OS=Trypanosoma cruzi (strain CL Brener) GN=TC00.1047053511001.9              | 98  | 84                               | 46                   |  |
| Q4E093 Q4E093_TRYCC            |                   | 40S ribosomal protein S18, putative OS=Trypanosoma cruzi (strain CL Brener) GN=TC00.104705350            | 75  | 73                               | 64                   |  |
| Q4DSU0 Q4DSU0_TRYCC            |                   | 40S ribosomal protein S6 OS=Trypanosoma cruzi (strain CL Brener) GN=TC00.1047053510769.49 P              | 69  | 72                               | 58                   |  |
| Q4CLU9 Q4CLU9_TRYCC            |                   | 40S ribosomal protein S8 OS=Trypanosoma cruzi (strain CL Brener) GN=TC00.1047053511069.20 P              | 66  | 60                               | 46                   |  |
| Q4D4L4 Q4D4L4_TRYCC            |                   | 40S ribosomal protein S11, putative OS=Trypanosoma cruzi (strain CL Brener) GN=TC00.104705350            | 58  | 47                               | 39                   |  |
| Q4DR85 Q4DR85_TRYCC            |                   | 40S ribosomal protein S14, putative OS=Trypanosoma cruzi (strain CL Brener) GN=TC00.104705344            | 60  | 61                               | 37                   |  |
| Q4CUL0 Q4CUL0_TRYCC            |                   | 40S ribosomal protein S3, putative OS=Trypanosoma cruzi (strain CL Brener) GN=TC00.104705343             | 81  | 72                               | 37                   |  |
| Q4DBN9 Q4DBN9_TRYCC            |                   | Ribosomal protein S19, putative OS=Trypanosoma cruzi (strain CL Brener) GN=TC00.10470535040              | 39  | 36                               | 36                   |  |
| Q4DY30 Q4DY30_TRYCC            | <b>KSRP</b>       | RNA-binding protein, putative OS=Trypanosoma cruzi (strain CL Brener) GN=TC00.1047053511727.             | 79  | 72                               | 29                   |  |
| Q4D4S1 Q4D4S1_TRYCC            |                   | 40S ribosomal protein S9, putative OS=Trypanosoma cruzi (strain CL Brener) GN=TC00.1047053504            | 38  | 38                               | 28                   |  |
| Q4CUC8 Q4CUC8_TRYCC            |                   | Ribosomal protein S7, putative OS=Trypanosoma cruzi (strain CL Brener) GN=TC00.1047053506693             | 84  | 80                               | 25                   |  |
| Q4CQU0 Q4CQU0_TRYCC            |                   | 40S ribosomal protein S4 OS=Trypanosoma cruzi (strain CL Brener) GN=TC00.1047053503719.20 F              | 66  | 58                               | 22                   |  |
| Q4D916 Q4D916_TRYCC            |                   | 40S ribosomal protein S16, putative OS=Trypanosoma cruzi (strain CL Brener) GN=TC00.104705350            | 48  | 52                               | 19                   |  |
| Q4EDN6 Q4EDN6_TRYCC            |                   | 40S ribosomal protein S15a, putative OS=Trypanosoma cruzi (strain CL Brener) GN=TC00.10470535            | 37  | 34                               | 15                   |  |
| Q4DI29 Q4DI29_TRYCC            |                   | 40S ribosomal protein S2, putative OS=Trypanosoma cruzi (strain CL Brener) GN=TC00.1047053503            | 80  | 74                               | 27                   |  |
| Q4CXN0 Q4CXN0_TRYCC            |                   | Ubiquitin/ribosomal protein S27a, putative OS=Trypanosoma cruzi (strain CL Brener) GN=TC00.1047          | 52  | 40                               | 14                   |  |
| Q4DXTX Q4DXTX_TRYCC            |                   | Ribosomal protein S25, putative OS=Trypanosoma cruzi (strain CL Brener) GN=TC00.104705350410             | 46  | 44                               | 8                    |  |
| Q4DK39 Q4DK39_TRYCC            |                   | 40S ribosomal protein S17, putative OS=Trypanosoma cruzi (strain CL Brener) GN=TC00.104705350            | 58  | 57                               | 16                   |  |
| Q4E088 Q4E088_TRYCC            |                   | 40S ribosomal protein S10, putative OS=Trypanosoma cruzi (strain CL Brener) GN=TC00.104705350            | 52  | 54                               | 22                   |  |
| Q4DW69 Q4DW69_TRYCC            |                   | 40S ribosomal protein S12 OS=Trypanosoma cruzi (strain CL Brener) GN=TC00.1047053508231.20               | 34  | 39                               | 13                   |  |
| Q4CXV6 Q4CXV6_TRYCC            |                   | 40S ribosomal protein S33, putative OS=Trypanosoma cruzi (strain CL Brener) GN=TC00.104705350            | 34  | 31                               | 17                   |  |
| Q4DT1Q Q4DT1Q_TRYCC            |                   | 40S ribosomal protein S23, putative OS=Trypanosoma cruzi (strain CL Brener) GN=TC00.104705350            | 33  | 28                               | 28                   |  |
| Q4D6H7 Q4D6H7_TRYCC            |                   | Ribosomal protein S20, putative OS=Trypanosoma cruzi (strain CL Brener) GN=TC00.104705350847             | 34  | 28                               | 16                   |  |
| Q4CWD6 Q4CWD6_TRYCC            |                   | 40S ribosomal protein S13, putative OS=Trypanosoma cruzi (strain CL Brener) GN=TC00.104705351            | 32  | 30                               | 18                   |  |
| Q4DN73 Q4DN73_TRYCC            |                   | 40S ribosomal protein S27, putative OS=Trypanosoma cruzi (strain CL Brener) GN=TC00.104705350            | 21  | 17                               | 25                   |  |
| Q4DW38 Q4DW38_TRYCC            |                   | 40S ribosomal protein S24 OS=Trypanosoma cruzi (strain CL Brener) GN=TC00.1047053507681.150              | 30  | 26                               | 15                   |  |
| Q4CMS5 Q4CMS5_TRYCC            |                   | Ribosomal protein S29, putative OS=Trypanosoma cruzi (strain CL Brener) GN=TC00.104705351101             | 17  | 15                               | 13                   |  |
| Q4DGZ5 Q4DGZ5_TRYCC            |                   | 40S ribosomal protein S15, putative OS=Trypanosoma cruzi (strain CL Brener) GN=TC00.104705351            | 23  | 20                               | 11                   |  |
| Q4CYE4 Q4CYE4_TRYCC            |                   | Ribosomal protein S26, putative OS=Trypanosoma cruzi (strain CL Brener) GN=TC00.104705350388             | 21  | 18                               | 12                   |  |
| Q4E3L9 Q4E3L9_TRYCC            |                   | 40S ribosomal protein S21, putative OS=Trypanosoma cruzi (strain CL Brener) GN=TC00.104705351            | 24  | 18                               | 7                    |  |
| Q4DA48 Q4DA48_TRYCC            |                   | 40S ribosomal protein S30, putative OS=Trypanosoma cruzi (strain CL Brener) GN=TC00.104705350            | 2   | 5                                |                      |  |
| <b>Initiation factors:</b>     |                   |                                                                                                          |     |                                  |                      |  |
|                                |                   |                                                                                                          |     | BASIC Spectral Count (# spectra) |                      |  |
|                                |                   |                                                                                                          |     | BEFORE Gel Filtration            | AFTER Gel Filtration |  |
| accession                      |                   | description                                                                                              | 40S | 43S                              | 43S                  |  |
| Q4DL69 Q4DL69_TRYCC            | <b>eIF3a</b>      | Uncharacterized protein OS=Trypanosoma cruzi (strain CL Brener) GN=TC00.1047053508919.140 P              | 86  | 129                              | 50                   |  |
| Q4DSL1 Q4DSL1_TRYCC            | <b>eIF3b</b>      | Translation initiation factor, putative OS=Trypanosoma cruzi (strain CL Brener) GN=TC00.104705351        | 95  | 159                              | 41                   |  |
| Q4E3G1 Q4E3G1_TRYCC            | <b>eIF3c</b>      | Eukaryotic translation initiation factor 3 subunit 8, putative OS=Trypanosoma cruzi (strain CL Brener)   | 63  | 96                               | 16                   |  |
| Q4D7F2 Q4D7F2_TRYCC            | <b>eIF3e</b>      | Eukaryotic translation initiation factor 3 subunit E OS=Trypanosoma cruzi (strain CL Brener) GN=TC0      | 60  | 103                              | 24                   |  |
| Q4E620 Q4E620_TRYCC            | <b>eIF2 alpha</b> | Elongation initiation factor 2 alpha subunit, putative OS=Trypanosoma cruzi (strain CL Brener) GN=T      | 5   | 105                              | 22                   |  |
| Q4DCN0 Q4DCN0_TRYCC            | <b>eIF3d</b>      | Eukaryotic translation initiation factor 3 subunit 7-like protein, putative OS=Trypanosoma cruzi (strain | 72  | 113                              | 16                   |  |
| Q4D452 Q4D452_TRYCC            | <b>eIF3i</b>      | Eukaryotic translation initiation factor 3 subunit I OS=Trypanosoma cruzi (strain CL Brener) GN=TC00     | 40  | 69                               | 14                   |  |
| Q4D5W3 Q4D5W3_TRYCC            | <b>eIF3l</b>      | Eukaryotic translation initiation factor 3 subunit L OS=Trypanosoma cruzi (strain CL Brener) GN=TC0      | 51  | 83                               | 25                   |  |
| Q4E3S5 Q4E3S5_TRYCC            | <b>eIF3h</b>      | Homology with eIF3H (InterPro), Uncharacterized protein OS=Trypanosoma cruzi (strain CL Brener)          | 36  | 58                               | 8                    |  |
| Q4CUG4 Q4CUG4_TRYCC            | <b>eIF3g</b>      | Eukaryotic translation initiation factor 3 subunit G OS=Trypanosoma cruzi (strain CL Brener) GN=TC0      | 43  | 70                               | 19                   |  |
| Q4CSE1 Q4CSE1_TRYCC            | <b>eIF5</b>       | Eukaryotic translation initiation factor 5, putative OS=Trypanosoma cruzi (strain CL Brener) GN=TC00     | 19  | 115                              | 49                   |  |
| Q4DDK1 Q4DDK1_TRYCC            | <b>eIF3k</b>      | Homology with eIF3K (InterPro), Uncharacterized protein OS=Trypanosoma cruzi (strain CL Brener)          | 18  | 29                               | 9                    |  |
| Q4DH88 Q4DH88_TRYCC            | <b>eIF2 beta</b>  | Translation initiation factor, putative OS=Trypanosoma cruzi (strain CL Brener) GN=TC00.104705350        | 7   | 45                               | 25                   |  |
| Q4DQZ2 Q4DQZ2_TRYCC            | <b>eIF3f</b>      | Uncharacterized protein OS=Trypanosoma cruzi (strain CL Brener) GN=TC00.1047053510089.200 P              | 46  | 68                               | 24                   |  |
| Q4CPV7 Q4CPV7_TRYCC            | <b>eIF2 gamma</b> | Eukaryotic translation initiation factor 2 subunit, putative OS=Trypanosoma cruzi (strain CL Brener) G   | 5   | 62                               | 7                    |  |
| Q4CQB1 Q4CQB1_TRYCC            | <b>eIF1A</b>      | Eukaryotic translation initiation factor 1A, putative (Fragment) OS=Trypanosoma cruzi (strain CL Bre     | 4   | 25                               | 4                    |  |
| Q4DM75 Q4DM75_TRYCC            | <b>eIF1</b>       | Protein translation factor SUI1 homolog, putative OS=Trypanosoma cruzi (strain CL Brener) GN=TC00        | 10  | 18                               | 5                    |  |

**Supplementary Table 1. Mass-spectrometry analysis of the *T. cruzi* 43S PIC, Related to Figure 1.** Composition of the *T. cruzi* 43S PIC in 40S ribosomal proteins and initiation factors. K-DDX60 and ABCE1 were singled out. The analysis compares the 43S related fractions without (labeled 40S) and with GMP-PNP (labeled 43S), before and after Gel-filtration. Accessions, description and spectral counts are indicated for each fraction. Full dataset can be found at the PRIDE partner repository with the dataset identifier PXD016063 (See Methods).

| Name                           |                   |                                                                                                                 | Spectral Count           |
|--------------------------------|-------------------|-----------------------------------------------------------------------------------------------------------------|--------------------------|
| accession                      | Name              | description                                                                                                     | IC                       |
| tr E9ACL4                      | <b>DDX60</b>      | Uncharacterized protein OS=Leishmania major GN=LMJF_03_0690 PE=4 SV=1                                           | 111                      |
| tr Q4QCE4                      | <b>ABCE1</b>      | Putative ATP-binding cassette protein subfamily E, member 1 OS=Leishmania major GN=ABCE1 PE=4 SV=1              | 101                      |
| <b>40S ribosomal proteins:</b> |                   |                                                                                                                 |                          |
| accession                      | Name              | description                                                                                                     | Spectral Count           |
| accession                      | Name              | description                                                                                                     | IC                       |
| tr Q868B1                      |                   | 40S ribosomal protein S5 OS=Leishmania major GN=LMJF_11_0960 PE=4 SV=1                                          | 188                      |
| tr Q4Q216                      |                   | Putative ubiquitin/ribosomal protein S27a OS=Leishmania major GN=LMJF_36_0600 PE=4 SV=1                         | 265                      |
| tr Q4Q1Y2                      |                   | Putative 40S ribosomal protein S18 OS=Leishmania major GN=LMJF_36_0940 PE=3 SV=1                                | 122                      |
| tr Q4QG31                      |                   | 40S ribosomal protein S4 OS=Leishmania major GN=RS4 PE=2 SV=1                                                   | 299                      |
| tr Q4Q8H1                      |                   | 40S ribosomal protein S14 OS=Leishmania major GN=LMJF_28_0960 PE=3 SV=1                                         | 155                      |
| tr Q4QC89                      |                   | Putative 40S ribosomal protein S23 OS=Leishmania major GN=LMJF_21_1060 PE=3 SV=1                                | 90                       |
| tr Q4Q4A0                      |                   | Putative 40S ribosomal protein S3 OS=Leishmania major GN=LMJF_15_0950 PE=4 SV=1                                 | 99                       |
| sp P25204                      |                   | 40S ribosomal protein S8 OS=Leishmania major GN=RPS8A PE=3 SV=1                                                 | 108                      |
| sp Q9NE83                      |                   | 40S ribosomal protein S6 OS=Leishmania major GN=RPS6 PE=3 SV=1                                                  | 175                      |
| tr Q4Q817                      |                   | Putative ribosomal protein S29 OS=Leishmania major GN=LMJF_28_2205 PE=4 SV=1                                    | 62                       |
| tr Q4Q1V1                      |                   | Putative 40S ribosomal protein S9 OS=Leishmania major GN=LMJF_36_1250 PE=2 SV=1                                 | 98                       |
| tr Q4Q5P0                      |                   | 40S ribosomal protein S2 OS=Leishmania major GN=LMJF_32_0450 PE=3 SV=1                                          | 144                      |
| tr Q4Q3M1                      |                   | Putative 40S ribosomal protein S13 OS=Leishmania major GN=LMJF_19_0390 PE=3 SV=1                                | 83                       |
| tr Q4QH01                      |                   | Putative 40S ribosomal protein S21 OS=Leishmania major GN=LMJF_11_0760 PE=4 SV=1                                | 39                       |
| sp Q4FX73                      |                   | 40S ribosomal protein S3a OS=Leishmania major GN=Lmjf.35.0400 PE=2 SV=1                                         | 288                      |
| tr Q4Q8G4                      |                   | Putative ribosomal protein S20 OS=Leishmania major GN=LMJF_28_1010 PE=3 SV=1                                    | 99                       |
| tr Q4Q7P0                      |                   | Putative 40S ribosomal protein S30 OS=Leishmania major GN=LMJF_30_0670 PE=4 SV=1                                | 36                       |
| tr Q4QCN7                      |                   | Putative 40S ribosomal protein S11 OS=Leishmania major GN=LMJF_20_1650 PE=3 SV=1                                | 153                      |
| sp Q4Q000                      |                   | 40S ribosomal protein SA OS=Leishmania major GN=Lmjf36.5010 PE=3 SV=1                                           | 145                      |
| tr E9AE88                      |                   | 40S ribosomal protein S19-like protein OS=Leishmania major GN=LMJF_29_2860 PE=4 SV=1                            | 129                      |
| tr Q4Q931                      |                   | Putative 40S ribosomal protein S33 OS=Leishmania major GN=S33-1 PE=4 SV=1                                       | 102                      |
| tr Q4Q1X7                      |                   | Putative 40S ribosomal protein S10 OS=Leishmania major GN=LMJF_36_0980 PE=4 SV=1                                | 101                      |
| tr Q4Q977                      |                   | 40S ribosomal protein S12 OS=Leishmania major GN=LMJF_13_0570 PE=3 SV=1                                         | 93                       |
| tr Q4QGW3                      |                   | Putative 40S ribosomal protein S15A OS=Leishmania major GN=LMJF_11_1190 PE=3 SV=1                               | 84                       |
| tr Q4Q9A5                      |                   | Putative 40S ribosomal protein S16 OS=Leishmania major GN=LMJF_26_0880 PE=2 SV=1                                | 79                       |
| tr Q4Q806                      |                   | Putative 40S ribosomal protein S17 OS=Leishmania major GN=LMJF_28_2555 PE=3 SV=1                                | 42                       |
| tr Q4Q140                      |                   | Putative 40S ribosomal protein S27-1 OS=Leishmania major GN=LMJF_36_3750 PE=3 SV=1                              | 63                       |
| tr Q4Q8L6                      |                   | Putative ribosomal protein S26 OS=Leishmania major GN=LMJF_28_0540 PE=4 SV=1                                    | 34                       |
| tr Q4Q1D2                      |                   | 40S ribosomal protein S24 OS=Leishmania major GN=S24E-2 PE=3 SV=1                                               | 120                      |
| tr Q4Q3G4                      |                   | Ribosomal protein S25 OS=Leishmania major GN=S25 PE=4 SV=1                                                      | 91                       |
| tr Q43943                      | <b>RACK1</b>      | LACK OS=Leishmania major PE=4 SV=1                                                                              | 58                       |
| tr Q4Q5K7                      | <b>KSRP</b>       | Putative RNA binding protein OS=Leishmania major GN=LMJF_32_0750 PE=4 SV=1                                      | 56                       |
| tr Q4QB0V                      |                   | Putative 40S ribosomal protein S15 OS=Leishmania major GN=LMJF_22_0420 PE=3 SV=1                                | 31                       |
| tr E9AC32                      |                   | Putative ribosomal protein S7 OS=Leishmania major GN=LMJF_01_0410 PE=4 SV=1                                     | 27                       |
| <b>Initiation factors:</b>     |                   |                                                                                                                 |                          |
| accession                      | Name              | description                                                                                                     | Spectral Count (# spots) |
| accession                      | Name              | description                                                                                                     | IC                       |
| tr Q4QEJ8                      | <b>eIF3a</b>      | Uncharacterized protein OS=Leishmania major GN=LMJF_17_0010 PE=4 SV=1                                           | 278                      |
| tr Q4QE62                      | <b>eIF3b</b>      | Putative translation initiation factor OS=Leishmania major GN=LMJF_17_1290 PE=4 SV=1                            | 175                      |
| tr Q4Q6Y6                      | <b>eIF3d</b>      | Eukaryotic translation initiation factor 3 subunit 7-like protein OS=Leishmania major GN=LMJF_36_0630 PE=3 SV=1 | 125                      |
| tr Q4Q833                      | <b>eIF3e</b>      | Eukaryotic translation initiation factor 3 subunit E OS=Leishmania major GN=LMJF_28_2310 PE=3 SV=1              | 84                       |
| tr Q4Q253                      | <b>eIF3l</b>      | Eukaryotic translation initiation factor 3 subunit L OS=Leishmania major GN=LMJF_36_0250 PE=3 SV=1              | 91                       |
| tr Q4Q127                      | <b>eIF3i</b>      | Eukaryotic translation initiation factor 3 subunit I OS=Leishmania major GN=LMJF_36_3880 PE=3 SV=1              | 79                       |
| tr E9ACP3                      | <b>eIF2 alpha</b> | Putative elongation initiation factor 2 alpha subunit OS=Leishmania major GN=LMJF_03_0980 PE=4 SV=1             | 76                       |
| tr Q4QIM7                      | <b>eIF3h</b>      | Uncharacterized protein OS=Leishmania major GN=LMJF_07_0640 PE=4 SV=1                                           | 76                       |
| tr Q4Q3H3                      | <b>eIF5</b>       | Putative eukaryotic translation initiation factor 5 OS=Leishmania major GN=LMJF_34_0350 PE=4 SV=1               | 75                       |
| tr Q4Q9T0                      | <b>eIF3f</b>      | Uncharacterized protein OS=Leishmania major GN=LMJF_25_1610 PE=4 SV=1                                           | 67                       |
| tr Q4Q055                      | <b>eIF3c</b>      | Putative eukaryotic translation initiation factor 3 subunit 8 OS=Leishmania major GN=LMJF_36_0650 PE=3 SV=1     | 62                       |
| tr Q4Q557                      | <b>eIF3k</b>      | Uncharacterized protein OS=Leishmania major GN=LMJF_32_2180 PE=4 SV=1                                           | 59                       |
| tr Q4QHR7                      | <b>eIF2 gamma</b> | Putative eukaryotic translation initiation factor 2 subunit OS=Leishmania major GN=LMJF_09_0950 PE=4 SV=1       | 49                       |
| tr Q4Q2S5                      | <b>eIF3g</b>      | Eukaryotic translation initiation factor 3 subunit G OS=Leishmania major GN=LMJF_34_2700 PE=3 SV=1              | 46                       |
| tr Q4QAL1                      | <b>eIF1A</b>      | Putative translation factor sui1 OS=Leishmania major GN=LMJF_24_1210 PE=4 SV=1                                  | 33                       |
| tr Q4QIB4                      | <b>eIF2 beta</b>  | Translation initiation factor-like protein OS=Leishmania major GN=LMJF_08_0550 PE=4 SV=1                        | 29                       |
| tr Q4Q060                      | <b>eIF1A</b>      | Putative eukaryotic translation initiation factor 1A OS=Leishmania major GN=LMJF_16_0140 PE=4 SV=1              | 27                       |

**Supplementary Table 2. Mass-spectrometry analysis of the *L. Tarentolae* 43S PIC, Related to Figure 1.** Composition of the *L. Tarentolae* 43S PIC in 40S ribosomal proteins and initiation factors. K-DDX60 and ABCE1 were singled out. The analysis of the 43S related fraction was made after supplementation with GMP-PNP (IC), before Gel-filtration. Accessions, description and spectral counts are indicated. Full dataset can be found at the PRIDE partner repository with the dataset identifier PXD016063 (See Methods).

|                | <b>Ribosomal RNA</b>                                                                                                                    | <b>Ribosomal protein</b>                                                                                                                                                                     | <b>Initiation factors</b>                                                                                                                                                                                                                                                                                                                                                                                                                                                   |
|----------------|-----------------------------------------------------------------------------------------------------------------------------------------|----------------------------------------------------------------------------------------------------------------------------------------------------------------------------------------------|-----------------------------------------------------------------------------------------------------------------------------------------------------------------------------------------------------------------------------------------------------------------------------------------------------------------------------------------------------------------------------------------------------------------------------------------------------------------------------|
| <b>eIF1</b>    | N65-G2303, C64-G2303, Q81-C2282, R33-A1341, R33-G2283, K37-G2283, R56-G2303, R61-C2183                                                  | <b>none</b>                                                                                                                                                                                  | <b>eIF2-β</b> : R29-S251, Q31-S327, Q43-T325, H27-T325, V77-Y326<br><b>eIF2-γ</b> : S16-N459, V17-V147, Q12-Q412, L21-V85, Q13-V147<br><b>eIF3c</b> : L49-F36, I54-W35 R53-E37, R52-T39, N96-R26, L49-I31                                                                                                                                                                                                                                                                   |
| <b>eIF1A</b>   | N48-A2277, R66-C620, W74-A2279, R155-G1685                                                                                              | <b>eS30</b> : E35-R10, F88-L8<br><b>uS13</b> : D162-R119, L164-V124<br><b>uS19</b> : V158-V100, V158-A82, V158-A111<br><b>uS12</b> : F88-L91                                                 | <b>eIF2-β</b> : Y133-L282, V134-N208, F135-P213, F135-Y279                                                                                                                                                                                                                                                                                                                                                                                                                  |
| <b>eIF2-α</b>  | <b>none</b>                                                                                                                             | <b>uS7</b> : Y200-K177, Y200-D180, Y200-R184, T148-R122, Y166-V120, T167-R122, D195-R184                                                                                                     | <b>tRNA</b> : K104-C55, R105-G52, R108-U54, W119-C55, H 232-C55, E296-U54<br><b>eIF2-γ</b> : R331-E279, F315-L321, V320-L350, P350-F268                                                                                                                                                                                                                                                                                                                                     |
| <b>eIF2-β</b>  | <b>R333-U1340, R333-G1342, R337-U1339, R337-U1340</b>                                                                                   | <b>uS19</b> : N259-R137                                                                                                                                                                      | <b>tRNA</b> : K221-A36, N255-G25, K300-G68, R303-G69,<br><b>eIF1</b> : S251-R29, E267-Q32, T325-Q43, Y326-V77, Y326-H27, S323-R29<br><b>eIF1A</b> : N208-V134, P213-F135, Y279-F135, L282-Y133<br><b>eIF5</b> : N118-R265, L120-V329, L120-A262, L123-V325, K125-Q364, V132-W372, L142-F331<br><b>eIF2-γ</b> : N173-H248, T176-Y245, G181-Y241, Y182-Y211, Y184-D240, S185-N238, R189-E204, M305-E83, T317-M86, T317-E83                                                    |
| <b>eIF2-γ</b>  | <b>none</b>                                                                                                                             | <b>none</b>                                                                                                                                                                                  | <b>tRNA</b> : K79-C73, D269-A75, K272-A72, R282-A75<br><b>eIF1</b> : V85-L21, I88-L21, V147-V17, N459-S16, Q412-Q12<br><b>eIF2-α</b> : E279-R331, L321- F315, L350- V320, F268- P350<br><b>eIF2-β</b> : H248- N173, Y245- T176, Y241- G181, Y211- Y182, D240- Y184, N238- S185, E204- R189, E83- M305, M86- T317, E83-T317<br><b>eIF5</b> : S224-R230, D219-R229, S220-R273, F383-L240, N430-T205, P431-D204, W465-T237, R469-T205<br><b>k-DDX60</b> : P171-P770, D209-R902 |
| <b>eIF3c</b>   | S52-A1360, R53-C1361, K56-C1596, R127-C370, Q204-U1526, K207-A1525 R215-A1523, R232-U1476 and U1478, Q329-G1438, R331-U1439, R243-U1526 | <b>eS27</b> : Q191-Q56, K192-E54                                                                                                                                                             | <b>eIF1</b> : I31-M97, I31-L49, F36-L49, E37-R53, W35-F91, W35-I54, T39-R52<br><b>eIF3d</b> : P234-W44, R295-W44, L489-W44, L233-A47, L380-F9, L418-W16, R419-P13, I434-M28, N437-D26<br><b>k-DDX60</b> : N-ter tail with Y832 and F834                                                                                                                                                                                                                                     |
| <b>eIF3a</b>   |                                                                                                                                         | <b>eS1</b> : T7-Q77, R8-T77, T12-R192, L17-I194                                                                                                                                              |                                                                                                                                                                                                                                                                                                                                                                                                                                                                             |
| <b>eIF3d</b>   | D43-G1532, D50-A1475, R149-U1863 and U1862, R294-U1866 and C1867, D306-U1864, Q296-G1861, K301-U1863                                    | <b>eS27</b> : T36-K37, I39-F80, I39-L74<br><b>S33</b> : R219-E76, D255-R83, K371-M98, Q368-K94, L435-M73<br><b>uS7</b> : Q434-E21, Q368-D26, E368-R51<br><b>RACK1</b> : S409-E277, N410-Q279 | <b>eIF3c</b> : F9-L380, P13-R419, W16-L418, D26-N437, W44-P234, W44-R295, W44-L489, A47-L233, M28-I434<br><b>eIF3e</b> : F3-T198, L5-A196, P6-T198, W16-I246, W16-Q247, E7-T245 ; P13-T248                                                                                                                                                                                                                                                                                  |
| <b>eIF5</b>    | <b>none</b>                                                                                                                             | <b>none</b>                                                                                                                                                                                  | <b>eIF2-β</b> : A262-L120, R265-N118, V325-L123, V329-L120, I332-L142, Q364-K125, W372-V132<br><b>eIF2-γ</b> : D204-P431, T205-R469, T205-N430, R229-D219, R230- S224, T237-W465, L240-F383, R273-S220<br><b>k-DDX60</b> : D284-S944, D288-R941, K292-S826                                                                                                                                                                                                                  |
| <b>k-DDX60</b> | S26-U1722, R95-U1723, K724-A51, Q725-A51, H728-G477                                                                                     | <b>eS12</b> : S3-D70, R6-E72<br><b>eS31</b> : Y5-K94, E92-L92, E93-K94<br><b>uS12</b> : R739-Q73, D744-N97 T740-N97                                                                          | <b>tRNA</b> : Q1548-A34, S1551-A34<br><b>eIF2-γ</b> : P770-P171, R902-D209<br><b>eIF3c</b> : Y832 and F834 with N-ter tail<br><b>eIF5</b> : S826-K292, R941-D288, S944-D284                                                                                                                                                                                                                                                                                                 |

**Supplementary Table 3. Detailed overview of interactions between eIFs, ribosomal proteins, rRNA and k-DDX60, Related to Figures 2, 3 and 5.** Novel interactions revealed by analysis are colored in deep blue. Most of these novel interactions are shown in ribbons and sticks models fitted into their corresponding densities in Fig. S 3 and 4.

| <b>Data Collection</b>                                              | <b><i>T. cruzi</i> 43S</b> | <b><i>T. cruzi</i> 43S + ATP</b> | <b><i>L. tarentolae</i> 43S</b> |
|---------------------------------------------------------------------|----------------------------|----------------------------------|---------------------------------|
| Microscope                                                          | Titan Krios                | Titan Krios                      | Talos Artica                    |
| Voltage (kV)                                                        | 300                        | 300                              | 200                             |
| Magnification                                                       | 127,272                    | 127,272                          | 120,000                         |
| Pixel size (Å)                                                      | 1.1                        | 1.1                              | 1.21                            |
| Detector                                                            | Gatan Summit K2            | Gatan Summit K2                  | Falcon III                      |
| Defocus range (µm)                                                  | -0.6 to -4.5               | -0.6 to -4.5                     | -0.6 to -3.0                    |
| Tot. electron exposure (e <sup>-</sup> Å <sup>-2</sup> )            | 30                         | 30                               | 40                              |
| Exposure rate (e <sup>-</sup> Å <sup>-2</sup> frame <sup>-1</sup> ) | 1.5                        | 1.5                              | 2.0                             |
| Data collection software                                            | SerialEM                   | EPU                              | EPU                             |
| <b>Data Processing</b>                                              |                            |                                  |                                 |
| Independent data collections                                        | 1                          | 1                                | 1                               |
| Useable micrographs                                                 | 3271                       | 2638                             | ?                               |
| Particles                                                           | 202920                     | 98840                            | 52302                           |
| Final particles (43S)                                               | 33775                      | 19700                            | 10144                           |
| Accuracy                                                            |                            |                                  |                                 |
| translations (pix) / rotations (°)                                  | 0.432/0.234375°            | 0.432/0.234375°                  | 0.432/0.234375°                 |
| Resolution (Å, 0.143 FSC)                                           | 3.33                       | 4.3                              | 8.1                             |
| Local resolution range (Å)                                          | 2.5-6                      | N/A                              | N/A                             |
| <b>Model Composition</b>                                            |                            |                                  |                                 |
| Chains                                                              | 59                         | N/A                              | N/A                             |
| Non-hydrogen atoms                                                  | 136893                     | N/A                              | N/A                             |
| Protein residues                                                    | 11196                      | N/A                              | N/A                             |
| RNA bases                                                           | 2225                       | N/A                              | N/A                             |
| <b>Refinement</b>                                                   |                            |                                  |                                 |
| Software                                                            | Phenix_ValidationEM        | N/A                              | N/A                             |
| Resolution (Å)                                                      | 3.33                       | N/A                              | N/A                             |
| CC (mask)                                                           | 0.57                       | N/A                              | N/A                             |
| CC (main chain)                                                     | 0.5                        | N/A                              | N/A                             |
| CC (side chain)                                                     | 0.58                       | N/A                              | N/A                             |
| <b>R.M.S deviations</b>                                             |                            |                                  |                                 |
| Bond lengths (Å)                                                    | 0.020                      | N/A                              | N/A                             |
| Bond angles (°)                                                     | 2.209                      | N/A                              | N/A                             |
| <b>Validation</b>                                                   |                            |                                  |                                 |
| Molprobrity score                                                   | 2.65                       | N/A                              | N/A                             |
| Clashscore, all atoms                                               | 9.20                       | N/A                              | N/A                             |
| Rotamers outliers (%)                                               | 3.48                       | N/A                              | N/A                             |
| Cβ outliers (%)                                                     | 1.41                       | N/A                              | N/A                             |
| CaBLAM outliers (%)                                                 | 10.9                       | N/A                              | N/A                             |
| <b>Ramachandran plot</b>                                            |                            |                                  |                                 |
| Favored (%)                                                         | 79.09                      | N/A                              | N/A                             |
| Allowed (%)                                                         | 14.19                      | N/A                              | N/A                             |
| Outliers (%)                                                        | 6.72                       | N/A                              | N/A                             |

**Supplementary Table 4. Data collection, processing, refinement and model statistics, Related to Figure 1 and STAR Methods section.** A near complete atomic model was only derived for the highest resolution cryo-EM reconstruction, i.e. the *T. cruzi* 43S PIC stalled with GMP-PNP. The *T. cruzi* 43S PIC stalled with GMP-PNP supplemented with ATP presents a lower resolution and therefore we didn't derive a full atomic model, instead we flexibly fitted k-DDX60 only into its map to illustrate its conformational changes.

| Primer                               | Sequence                                           |
|--------------------------------------|----------------------------------------------------|
| AH-h3c-PmeI                          | ATATAGTTTAAACGCCATGTCGCGGTTTTTCACC                 |
| AH-h3c-FseI                          | ATATAGGCCGGCCTCAGTAGGCCGTCTGAGACTG                 |
| AH-h3a-PmeI                          | ATATAGTTTAAACAAGATGCCGGCCTATTTTCAG                 |
| AH-h3a-FseI                          | ATATAGGCCGGCCTTAACGTCGTA CTGTGGTCCA                |
| AH-h3m-EcoRI                         | ATATAGAATTCACCATGAGCGTCCCGGCCTTC                   |
| AH-h3m-FseI                          | ATATAGGCCGGCCTCAGGTATCAGAAAGACTCAA                 |
| AH-h3k-EcoRI                         | ATATAGAATTCGTCATGGCGATGTTTGAGCAG                   |
| AH-h3k-FseI                          | ATATAGGCCGGCCTTACTGGGAGGAGGCCATGAT                 |
| AH-h3d-EcoRI                         | ATATAGAATTC AAGATGGCAAAGTTCATGACA                  |
| AH-h3d-FseI                          | ATATAGGCCGGCCTTAAGTTTCTCCTCTTCTTCTCCTC             |
| AH-h3c-EcoRI                         | ATATAGAATTC AAGATGGCGGAGTACGACTTG                  |
| AH-h3c-FseI                          | ATATAGGCCGGCCTCAGTAGAAGCCAGAATCTTG                 |
| DS-eIF1-BamHI                        | ATCGGATCCATATGTCCGCTATCCAGAACC                     |
| DS-eIF1-SalI                         | TGTGTGCGACTTAAACCCATGAACCTTCAG                     |
| SW-heIF5-EcoRI                       | ATAGAATTCGATGTCTGTCAATGTCAACC                      |
| SW-heIF5-SalI-R                      | ACTAGTCGACTTAAATGGCATCAATATCG                      |
| DS-eIF2 $\beta$ -BamHI               | ATCGGATCCATATGTCTGGGGACGAGATG                      |
| DS-eIF2 $\beta$ -SalI                | CGTGTGCGACTTAGTTAGCTTTGGCACG                       |
| AH-h3c-325-FseI                      | ATATACGGCCGGCCTCAGGTGATCTCAGTTCCTTGGC              |
| TS-h3c-326-PmeI                      | ATATAGTTTAAACGCCATGCATGCTGTTGTTATCAAGAACTG         |
| TS-h3c-30-325-PmeI                   | ATATAGTTTAAACGCCATGAACTATGGCAAACAGCCATTG           |
| TP-h3c-130-325-PmeI                  | GCCGCGTTTAAACGCCATGAACAAGAACAATGCCAAGGC            |
| TP-pGL4-CMV-heIF2 $\beta$ -EcoRI     | CGCCAGAATTCACCATGTCTGGGGACGAGATGATT                |
| TP-pGL4-CMV-eIF2 $\beta$ -FseI       | ATATAGGCCGGCCTTAGTTAGCTTTGGCACGGAG                 |
| TP-pGL4-CMV-eIF2 $\beta$ -1-309-FseI | CGCCAGGCCGGCCTTAACATCTAGAATGACAAGTTTC              |
| TP-pGEX-5X3-teIF1-BamHI              | ACCTAGGATCCCCATGCTAAACAACGAGCTCGCTAACC             |
| TP-pGEX-5X3-teIF1-SalI               | ACCGAGTCGACTTAGTTCAGAGAGTGGATCTC                   |
| TP-pGEX-5X3-teIF5-BamHI              | ACCGAGGATCCCCATGTGCGTTCCAATGATACCCATTG             |
| TP-pGEX-5X3-teIF5-SalI               | CGCTAGTCGACCTATGTTCGATCCTACAAGCCATTCGAC            |
| TP-pGL4-teIF5-EcoRI                  | GCTGTGAATTCGCCACCATGTGCGTTCCAATGATACCC             |
| TP-pGL4-teIF5-FseI                   | TATATGGCCGGCCCTATGTTCGATCCTACAAGCCATTC             |
| TP-pGL4-CMV-teIF3c-PmeI              | CGCCGTTTAAACACCATGAGCAACTTTTTTGATGTCAGCGAC<br>AGTG |
| TP-pGL4-CMV-teIF3c-FseI              | ATATAGGCCGGCCGTTAAAATCCTCCTCTACCACGTCCTCGAC        |
| TP-pGL4-CMV-teIF3c-14-PmeI           | CGCGCGTTTAAACACCATGCTGGATGAGGTCATACATCAGAT<br>G    |
| TP-pGL4-CMV-teIF3c-39-PmeI           | AGCCAGTTTAAACACCATGACCGATGATGAGGACGCGGATG          |
| TP-pGL4-CMV-teIF3c-172-FseI          | TATATGGCCGGCCGTTACTCCTCACCTGTCCTTCATC              |
| TP-pGEX-teIF3c-BamHI                 | GCGGCGGATCCCCATGAGCAACTTTTTTGATGTC                 |
| TP-pGEX-teIF3c-1-172-EcoRI           | GCCGCGAATTCCTTTACTCCTCACCTGTCCTTC                  |
| TP-pGEX-5X3-eIF3e-BamHI              | ATATAGGATCCCCATGGCGGAGTACGACTTGAC                  |
| TP-pGEX-5X3-eIF3e-SalI               | ATGCCGTCGACTCAGTAGAAGCCAGAATCTTG                   |

|                          |                                        |
|--------------------------|----------------------------------------|
| TP-pGL4-CMV-h3d-19-EcoRI | CTGCAGAATTCAAGATGTGTGCGGTTCCCGAGCAG    |
| AH-h3d-FseI              | ATATAGGCCGGCCTTAAGTTTCTTCCTCTTCTTCCTC  |
| AH-h3d-EcoRI             | ATATAGAATTCAAGATGGCAAAGTTCATGACA       |
| TP-pGL4-CMV-h3d-114-FseI | ACGTAGGCCGGCCTTACATGTTCCGACGATCTTTGTC  |
| TP-pGEX-heIF3d-BamHI     | ATATCGGATCCCCATGGCAAAGTTCATGACACCC     |
| TP-pGEX-heIF3d-SalI      | GCGCGGTCGACTTAAGTTTCTTCCTCTTCTTCCTC    |
| TP-pGEX-eIF3c-EcoRI      | ACCGAGAATTCCATGTCGCGGTTTTTTCACCACC     |
| TP-pGEX-eIF3c-SalI       | TATATGTCGACTCAGTAGGCCGTCTGAGACTG       |
| TP-pGEX-eIF3a-SalI       | ACCTAGTCGACATGCCGGCCTATTTTCAGAGG       |
| TP-pGEX-eIF3a-NotI       | ATATAGCGGCCGCTTAACGTCGTA CTGTGGTCCA    |
| TP-telF3c-AsiSI          | GCACCGCGATCGCATGAGCAACTTTTTTGATGTCAGCG |
| TP-telF3c-1-172-MluI     | ATATAACGCGTCTCCTCACCCTGTCCTTCATC       |
| TP-telF5-AsiSI           | ACCGAGCGATCGCATGTCGGTCCAATGATACCC      |
| TP-telF5-MluI            | TCGATACGCGTTGTCGATCCTACAAGCCATTC       |

**Supplementary Table 5. List of primers, Related to STAR Methods section.**

| Gene string                   | Sequence 5'-3'                                                                                                                                                                                                                                                                                                                                                                                                                                                                                                                                                                                                                                                                                                                                                                                                                                                                                                                                                                                                             |
|-------------------------------|----------------------------------------------------------------------------------------------------------------------------------------------------------------------------------------------------------------------------------------------------------------------------------------------------------------------------------------------------------------------------------------------------------------------------------------------------------------------------------------------------------------------------------------------------------------------------------------------------------------------------------------------------------------------------------------------------------------------------------------------------------------------------------------------------------------------------------------------------------------------------------------------------------------------------------------------------------------------------------------------------------------------------|
| heIF1-box-Ala-102-113         | GGCGACCATCCTCCAAAATCGGATCTGATCGAAGGTCGTGGGATCCAT<br>ATGTCCGCTATCCAGAACCTCCACTCTTTTCGACCCCTTTGCTGATGCAA<br>GTAAGGGTGATGACCTGCTTCCTGCTGGCACTGAGGATTATATCCATA<br>TAAGAATTCAACAGAGAAAACGGCAGGAAGACCCTTACTACTGTCCAA<br>GGGATCGCTGATGATTACGATAAAAAGAACTAGTGAAGGCGTTTAA<br>GAAAAAGTTTGCCTGCAATGGTACTGTAATTGAGCATCCGGAATATGG<br>AGAAGTAATTCAGCTACAGGGTGACCAACGCAAGAACATATGCCAGT<br>TCCTCGTAGAGATTGGAGCAGCAGCAGCTGCAGCAGCCGCAGCCGCG<br>GCAGCATAAGTCGACTCGAGCGGCCGCATCGTGACTGACTGACGATC<br>TGCCTCGC                                                                                                                                                                                                                                                                                                                                                                                                                                                                                                                                  |
| pGEX-heIF3e-delta-244-252     | GACCATCCTCCAAAATCGGATCTGATCGAAGGTCGTGGGATCCCCATG<br>GCGGAGTACGACTTGACTACTCGCATCGCGCACTTTTTGGATCGGCAT<br>CTAGTCTTTCCGCTTCTTGAATTTCTCTCTGTAAAGGAGATATATAATG<br>AAAAGGAATTATTACAAGGTAAATTGGACCTTCTTAGTGATACCAACA<br>TGGTAGACTTTTGTATGGATGTATACAAAAACCTTTATTCTGATGATA<br>TTCCTCATGCTTTGAGAGAGAAAAGAACCACAGTGGTTGCACAACCTG<br>AAACAGCTTCAGGCAGAAACAGAACCAATTGTGAAGATGTTTGAAGA<br>TCCAGAACTACAAGGCAAATGCAGTCAACCAGGGATGGTAGGATGC<br>TCTTTGACTACCTGGCGGACAAGCATGGTTTTAGGCAGGAATATTTAG<br>ATACACTCTACAGATATGCAAAATTCAGTACGAATGTGGGAATTACT<br>CAGGAGCAGCAGAATATCTTTATTTTTTTAGAGTGCTGGTTCCAGCAA<br>CAGATAGAAATGCTTTAAGTTCCTCTGGGGAAAGCTGGCCTCTGAAA<br>TCTTAATGCAGAATTGGGATGCAGCCATGGAAGACCTTACACGGTTAA<br>AAGAGACCATAGATAATAATTCTGTGAGTTCTCCACTTCAGTCTCTTC<br>AGCAGAGAACATGGCTCATTCACTGGTCTCTGTTTGTCTTCAATCA<br>CCCCAAAGGTCGCGATAATATTATTGACCTCTTCCTTTATCAGCCACA<br>ATATCTTATTCTTCGCTATTTGACTACAGCAGTCATAACAAACAAGGA<br>TGTTTCGAAAACGTCGGCAGGTTCTAAAAGATCTAGTTAAAGTTATTCA<br>ACAGGAGTCTTACACATATAAA                                  |
| pGEX-heIF3e-I246A-Q247A-T248A | GACCATCCTCCAAAATCGGATCTGATCGAAGGTCGTGGGATCCCCATG<br>GCGGAGTACGACTTGACTACTCGCATCGCGCACTTTTTGGATCGGCAT<br>CTAGTCTTTCCGCTTCTTGAATTTCTCTCTGTAAAGGAGATATATAATG<br>AAAAGGAATTATTACAAGGTAAATTGGACCTTCTTAGTGATACCAACA<br>TGGTAGACTTTTGTATGGATGTATACAAAAACCTTTATTCTGATGATA<br>TTCCTCATGCTTTGAGAGAGAAAAGAACCACAGTGGTTGCACAACCTG<br>AAACAGCTTCAGGCAGAAACAGAACCAATTGTGAAGATGTTTGAAGA<br>TCCAGAACTACAAGGCAAATGCAGTCAACCAGGGATGGTAGGATGC<br>TCTTTGACTACCTGGCGGACAAGCATGGTTTTAGGCAGGAATATTTAG<br>ATACACTCTACAGATATGCAAAATTCAGTACGAATGTGGGAATTACT<br>CAGGAGCAGCAGAATATCTTTATTTTTTTAGAGTGCTGGTTCCAGCAA<br>CAGATAGAAATGCTTTAAGTTCCTCTGGGGAAAGCTGGCCTCTGAAA<br>TCTTAATGCAGAATTGGGATGCAGCCATGGAAGACCTTACACGGTTAA<br>AAGAGACCATAGATAATAATTCTGTGAGTTCTCCACTTCAGTCTCTTC<br>AGCAGAGAACATGGCTCATTCACTGGTCTCTGTTTGTCTTCAATCA<br>CCCCAAAGGTCGCGATAATATTATTGACCTCTTCCTTTATCAGCCACA<br>ATATCTTAAATGCAGCTGCGGCAATGTGTCCACACATTCTTCGCTATTTG<br>ACTACAGCAGTCATAACAAACAAGGATGTTTCGAAAACGTCGGCAGGT<br>TCTAAAAGATCTAGTTAAAGTTATTCAACAGGAGTCTTACACATATAAA<br>A |



|                             |                                                                                                                                                                                                                                                                                                                                                                                                                                                                                                                                                                                                                                                                                                                                                                                                                                                                                                                                                                                                                                                                                                                        |
|-----------------------------|------------------------------------------------------------------------------------------------------------------------------------------------------------------------------------------------------------------------------------------------------------------------------------------------------------------------------------------------------------------------------------------------------------------------------------------------------------------------------------------------------------------------------------------------------------------------------------------------------------------------------------------------------------------------------------------------------------------------------------------------------------------------------------------------------------------------------------------------------------------------------------------------------------------------------------------------------------------------------------------------------------------------------------------------------------------------------------------------------------------------|
| pGL4-CMV-h3c-1-325-d171-240 | TGGGAGGTCTATATAAGCAGAGCTCTCTGGCTAACTAGAGAACCCACT<br>GCTTACTGGCTTATCGAAATTAATACGACTCACTATAGGGAGACCCAA<br>GCTGGCTAGCGTTTAAACGCCATGTCGCGGTTTTTCACCACCGGTTTCG<br>GACAGCGAGTCCGAGTCGTCCTTGTCCGGGGAGGAGCTCGTCACCAA<br>ACCTGTCCGAGGCAACTATGGCAAACAGCCATTGTTGCTGAGCGAGG<br>ATGAAGAAGATACCAAGAGAGTTGTCCGCAGTGCCAAGGACAAGAGG<br>TTTGAGGAGCTGACCAACCTTATCCGGACCATCCGTAATGCCATGAAG<br>ATTTCGTGATGTCACCAAGTGCCTGGAAGAGTTTGAGCTCCTGGGAAAA<br>GCATATGGGAAGGCCAAAAGCATTGTGGACAAAGAAGGTGTCCCCCG<br>GTTCTATATCCGCATCCTGGCTGACCTAGAGGACTATCTTAATGAGCT<br>TTGGGAAGATAAGGAAGGGAAGAAGAAGATGAACAAGAACAATGCC<br>AAGGCTCTGAGCACCTTGCCTCAGAAGATCCGAAAATACAACCGTGA<br>TTTCGAGTCCCATATCACAAGCTACAAGCAGAACCCCGAGCAGTCTGC<br>GGATGAAGATGACTCAGAGGAGGAAGAAGGGAAACAAACCGCGCTG<br>GCCTCAAGATTCTTAAAAAGGCACCCACCACAGATGAGGACAAGAA<br>GGCAGCCGAGAAGAAACGGGAGGACAAAGCTAAGAAGAAGCACGAC<br>AGGAAATCCAAGCGCTGGATGAGGAGGAGGAGGACAATGAAGGCG<br>GGGAGTGGGAAAGGGTCCGGGGCGGAGTGCCGTTGGTTAAGGAGAA<br>GCCAAAATGTTTGCCAAGGGAAGTACCTGAGGACCGGCGCCGC<br>TTCGAGCAGACATGATAAGATACATTGATGAGTTTGGACAAACCACA<br>ACTAGAATGCAGTGAAAAAATGCTTTATTTGTGAAATTTGTGATGCT<br>ATTGCTTTA |
| pGL4-CMV-h3d-W16A-G17A-P18A | GGCTAGCGTTTAAACGGGCCCTCTAGACTCGAGCGGCCGCCACTGTGC<br>TGGATATCTGCAGAATTCAAGATGGCAAAGTTCATGACACCCGTGATC<br>CAGGACAACCCCTCAGGCGCGGCTGCCTGTGCGGTTCCCGAGCAGTTT<br>CGGGATATGCCCTACCAGCCGTTTCAGCAAAGGAGATCGGCTAGGAAA<br>GGTTGCAGACTGGACAGGAGCCACATACCAAGATAAGAGGTACACAA<br>ATAAGTACTCCTCTCAGTTTGGTGGTGGAAAGTCAATATGCTTATTTCC<br>ATGAGGAGGATGAAAGTAGCTTCCAGCTGGTGGATACAGCGCGCACAA<br>CAGAAGACGGCCTACCA                                                                                                                                                                                                                                                                                                                                                                                                                                                                                                                                                                                                                                                                                                                          |

**Supplementary Table 6. List of gene strings, Related to STAR Methods section.**
